# Supplementary material
Source: MDPI journal article supplement (https://www.mdpi.com/2218-0532/91/3/42)

A2.1.fid  
1D

| Parameter                  | Value                                                    |
|----------------------------|----------------------------------------------------------|
| 1 Title                    | A2.1.fid                                                 |
| 2 Comment                  | PROTON DMSO {D:\nmrdata\2022\ Oktober\ WSU\ Ayo} nmrsu 2 |
| 3 Origin                   | Bruker BioSpin GmbH                                      |
| 4 Owner                    | nmrsu                                                    |
| 5 Site                     |                                                          |
| 6 Instrument               | Avance                                                   |
| 7 Author                   |                                                          |
| 8 Solvent                  | DMSO                                                     |
| 9 Temperature              | 298.0                                                    |
| 10 Pulse Sequence          | zg30                                                     |
| 11 Experiment              | 1D                                                       |
| 12 Probe                   | Z144570_0007 ( PA TBI 600S3 H / C-BB-D-.05 Z )           |
| 13 Number of Scans         | 64                                                       |
| 14 Receiver Gain           | 101.0                                                    |
| 15 Relaxation Delay        | 1.0000                                                   |
| 16 Pulse Width             | 10.0000                                                  |
| 17 Presaturation Frequency |                                                          |
| 18 Acquisition Time        | 2.7525                                                   |
| 19 Acquisition Date        | 2022-10-20T07:09:49                                      |
| 20 Modification Date       | 2022-10-20T07:09:45                                      |
| 21 Class                   |                                                          |
| 22 Spectrometer Frequency  | 600.09                                                   |
| 23 Spectral Width          | 11904.8                                                  |
| 24 Lowest Frequency        | -2249.9                                                  |
| 25 Nucleus                 | 1H                                                       |
| 26 Acquired Size           | 32768                                                    |
| 27 Spectral Size           | 131072                                                   |

Figure S4

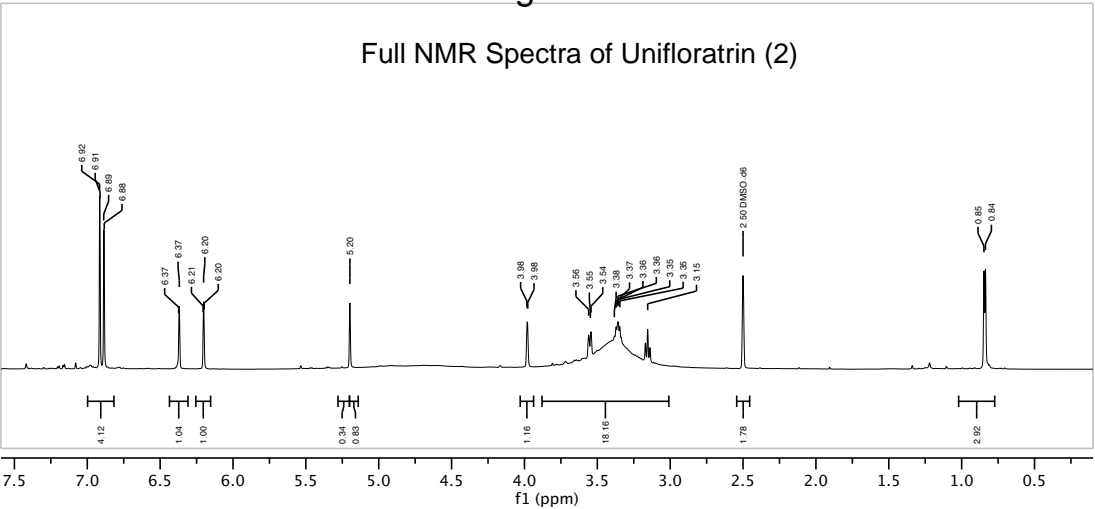

|    | ppm   | Hz     |    | ppm  | Hz     |
|----|-------|--------|----|------|--------|
| 1  | 12.68 | 7610.9 | 23 | 3.46 | 2078.3 |
| 2  | 6.92  | 4150.0 | 24 | 3.46 | 2073.4 |
| 3  | 6.91  | 4148.1 | 25 | 3.40 | 2040.8 |
| 4  | 6.89  | 4132.8 | 26 | 3.38 | 2030.3 |
| 5  | 6.88  | 4130.8 | 27 | 3.37 | 2023.4 |
| 6  | 6.37  | 3824.2 | 28 | 3.36 | 2018.3 |
| 7  | 6.37  | 3821.6 | 29 | 3.36 | 2015.3 |
| 8  | 6.21  | 3723.7 | 30 | 3.35 | 2013.0 |
| 9  | 6.20  | 3721.5 | 31 | 3.35 | 2007.8 |
| 10 | 6.20  | 3719.1 | 32 | 3.34 | 2001.4 |
| 11 | 5.20  | 3119.2 | 33 | 3.32 | 1993.6 |
| 12 | 3.98  | 2390.2 | 34 | 3.31 | 1984.0 |
| 13 | 3.98  | 2386.9 | 35 | 3.30 | 1977.7 |
| 14 | 3.56  | 2138.3 | 36 | 3.28 | 1971.2 |
| 15 | 3.56  | 2135.8 | 37 | 3.28 | 1967.1 |
| 16 | 3.55  | 2133.3 | 38 | 3.26 | 1953.4 |
| 17 | 3.55  | 2128.9 | 39 | 3.17 | 1902.4 |
| 18 | 3.54  | 2126.3 | 40 | 3.15 | 1893.1 |
| 19 | 3.54  | 2123.8 | 41 | 3.14 | 1883.6 |
| 20 | 3.52  | 2109.4 | 42 | 0.85 | 508.4  |
| 21 | 3.50  | 2101.4 | 43 | 0.84 | 502.1  |
| 22 | 3.47  | 2082.9 |    |      |        |

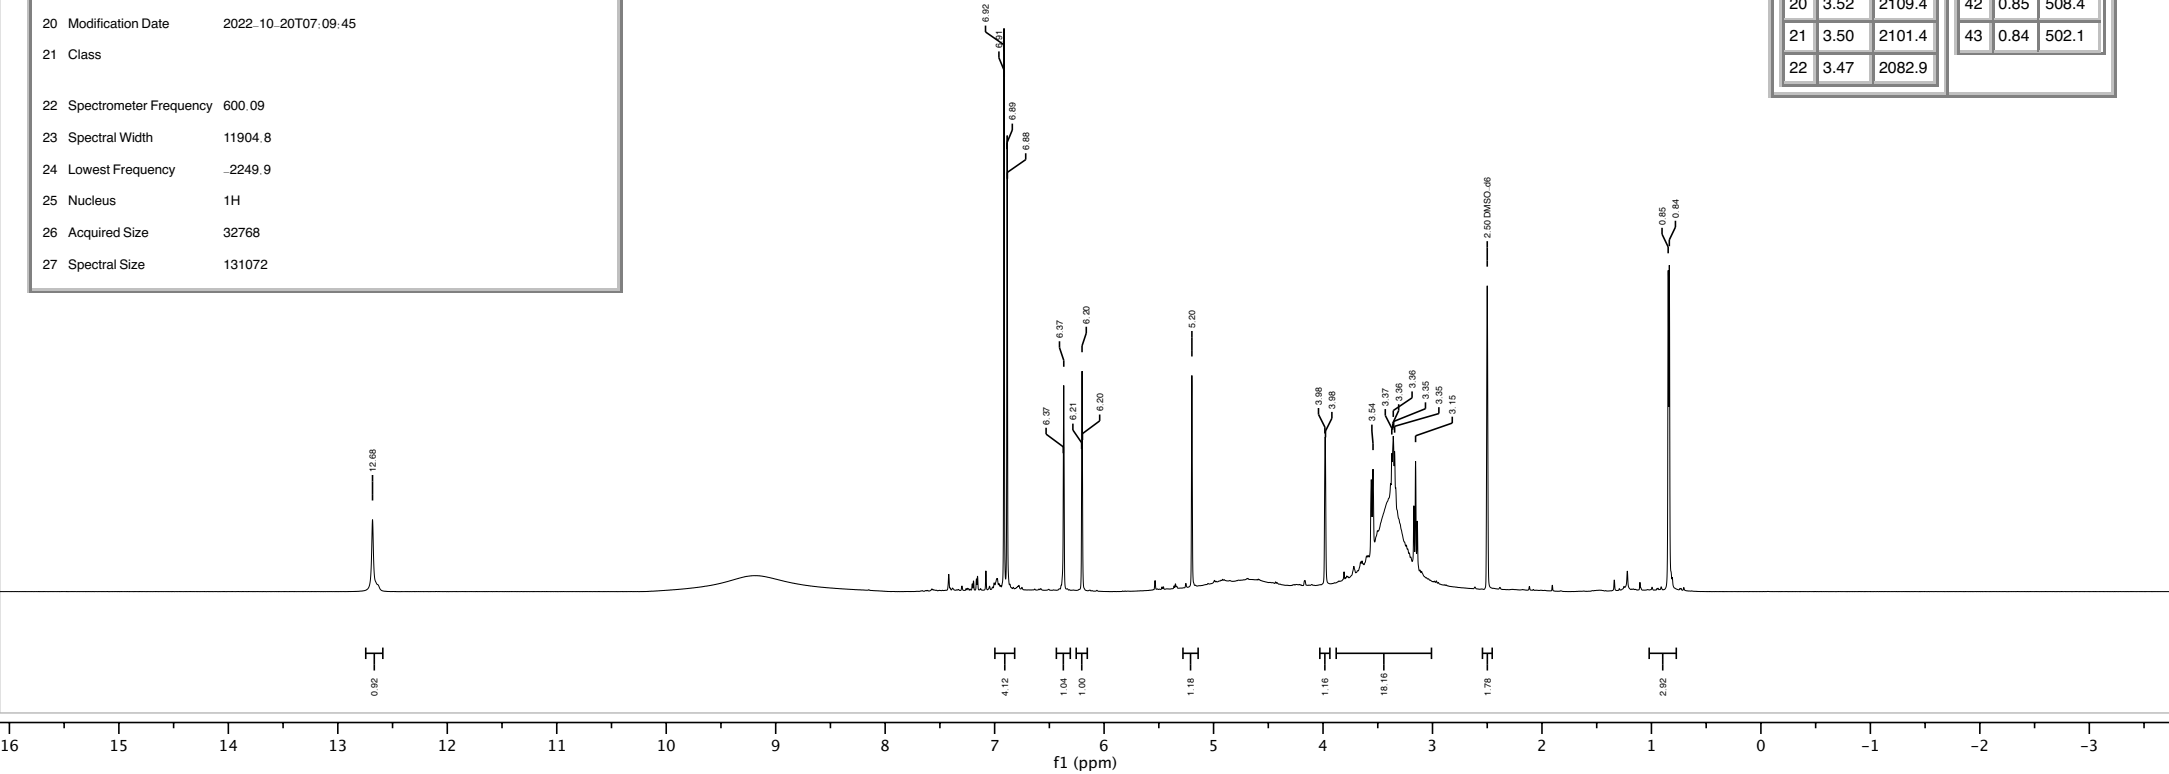

A2.3.fid  
1D

| Parameter |                         | Value                                                 |
|-----------|-------------------------|-------------------------------------------------------|
| 1         | Title                   | A2.3.fid                                              |
| 2         | Comment                 | C13CPD DMSO (D:\nmrdata\2022\Oktober\WSU\Ayo) nmrsu 2 |
| 3         | Origin                  | Bruker BioSpin GmbH                                   |
| 4         | Owner                   | nmrsu                                                 |
| 5         | Site                    |                                                       |
| 6         | Instrument              | Avance                                                |
| 7         | Author                  |                                                       |
| 8         | Solvent                 | DMSO                                                  |
| 9         | Temperature             | 298.0                                                 |
| 10        | Pulse Sequence          | zgpg                                                  |
| 11        | Experiment              | 1D                                                    |
| 12        | Probe                   | Z144570_0007 (PA TBI 600S3 H / C-BB-D.05 Z)           |
| 13        | Number of Scans         | 15360                                                 |
| 14        | Receiver Gain           | 101.0                                                 |
| 15        | Relaxation Delay        | 2.0000                                                |
| 16        | Pulse Width             | 20.0000                                               |
| 17        | Presaturation Frequency |                                                       |
| 18        | Acquisition Time        | 0.9175                                                |
| 19        | Acquisition Date        | 2022-10-23T02:52:33                                   |
| 20        | Modification Date       | 2022-10-23T02:52:27                                   |
| 21        | Class                   |                                                       |
| 22        | Spectrometer Frequency  | 150.91                                                |
| 23        | Spectral Width          | 35714.3                                               |
| 24        | Lowest Frequency        | -2767.9                                               |
| 25        | Nucleus                 | 13C                                                   |
| 26        | Acquired Size           | 32768                                                 |
| 27        | Spectral Size           | 65536                                                 |

<sup>13</sup>C NMR (151 MHz, DMSO) δ 177.83, 167.52, 164.23, 161.36, 157.55, 156.46, 145.82, 145.44, 138.02, 136.50, 134.32, 120.48, 119.65, 108.75, 107.94, 104.08, 101.98, 98.71, 93.57, 71.31, 70.60, 70.42, 70.06, 17.57.

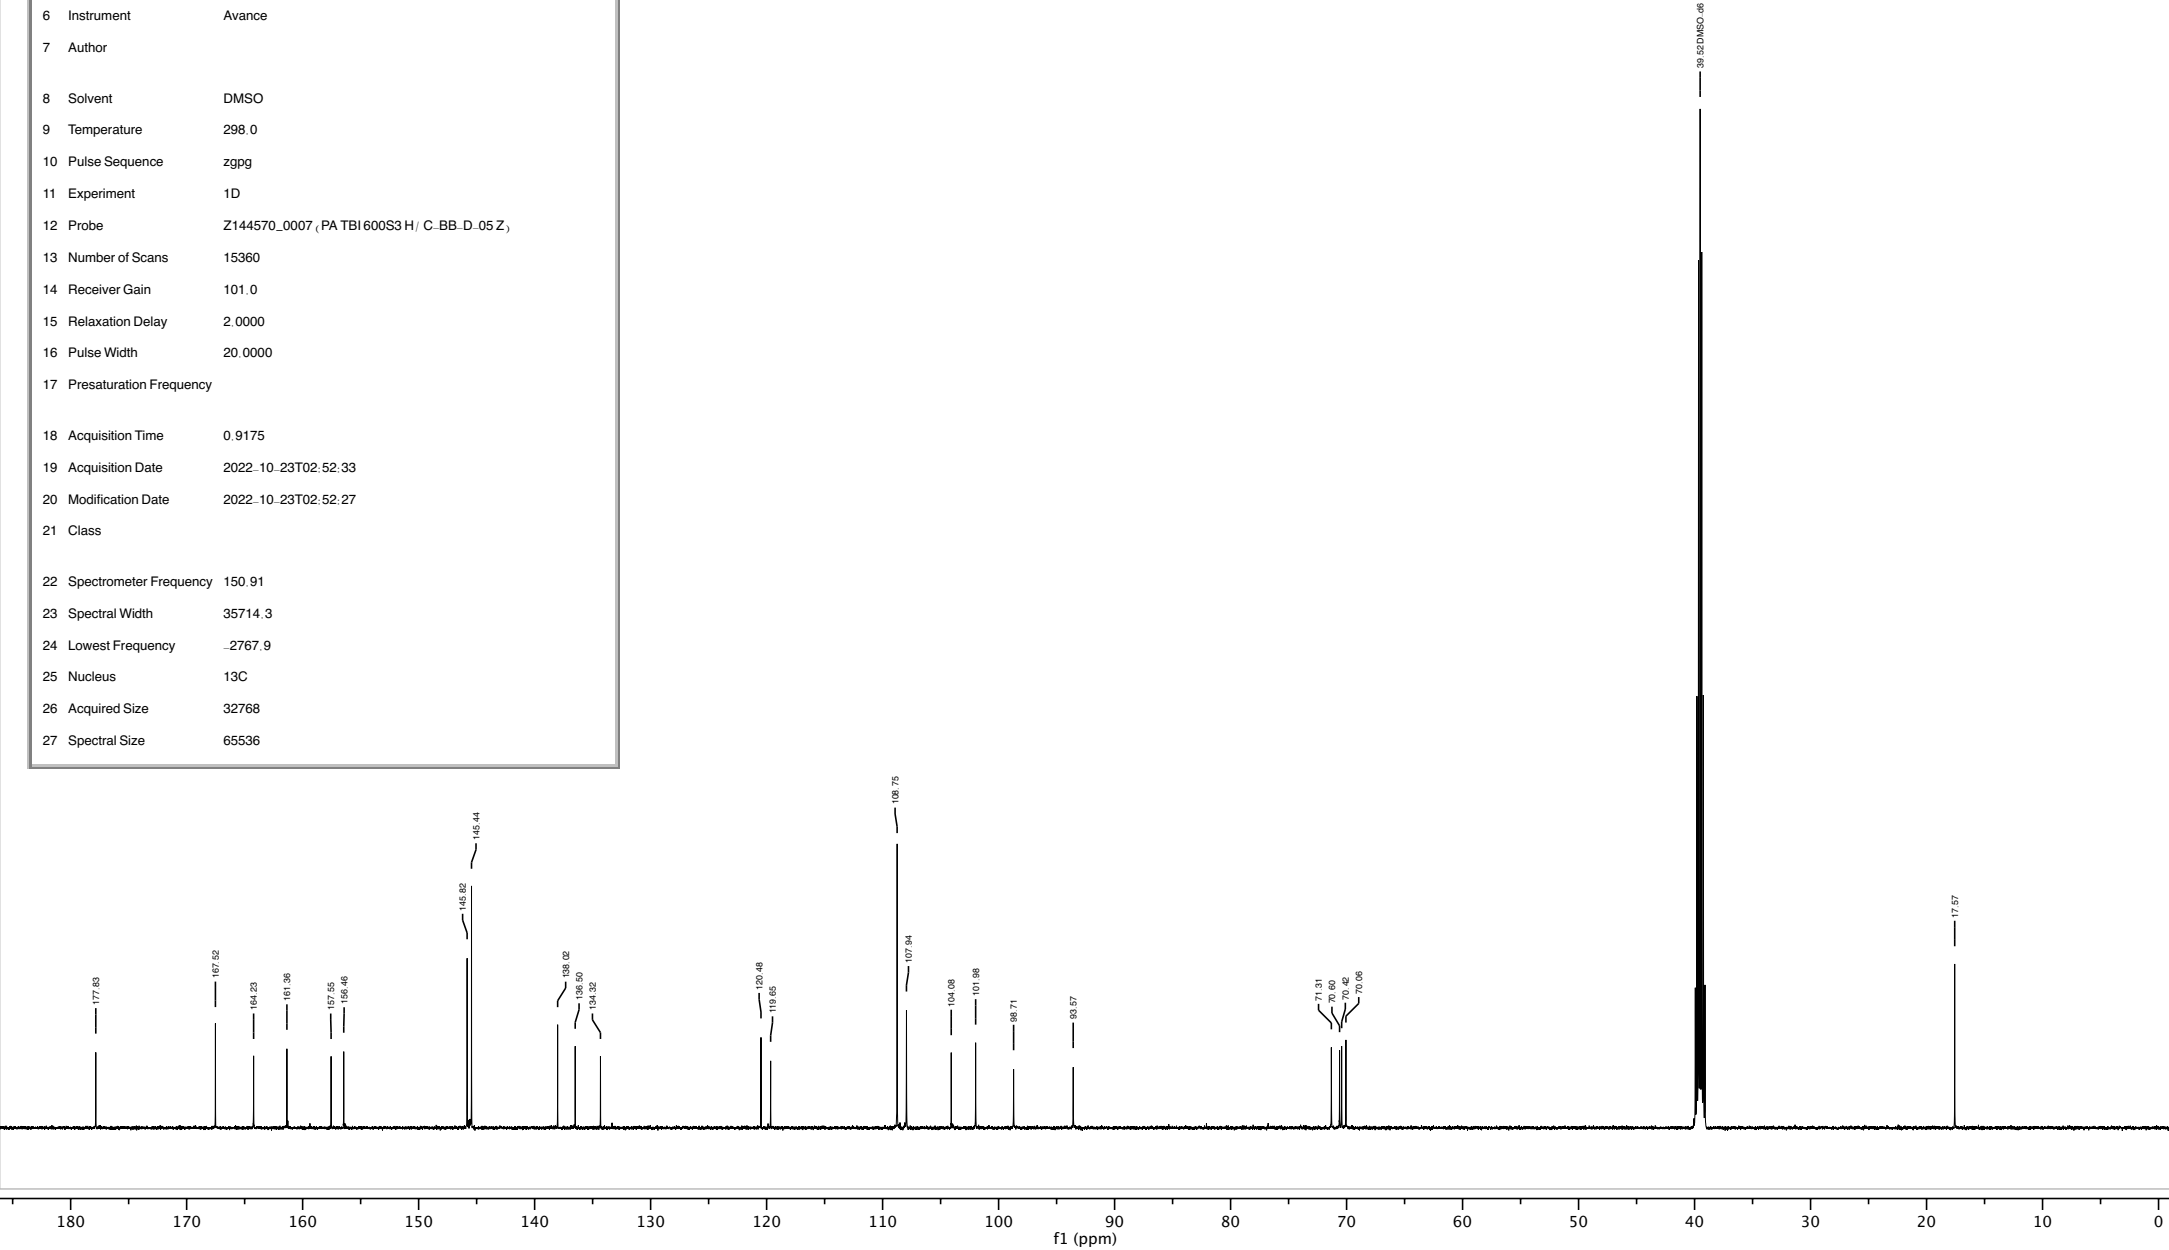

A2.4.fid  
DEPT\_135

| Parameter |                         | Value                                                      |
|-----------|-------------------------|------------------------------------------------------------|
| 1         | Title                   | A2.4.fid                                                   |
| 2         | Comment                 | C13DEPT135p DMSO (D:\nmrdata\2022\Oktober\WSU\Ayo} nmrsu 2 |
| 3         | Origin                  | Bruker BioSpin GmbH                                        |
| 4         | Owner                   | nmrsu                                                      |
| 5         | Site                    |                                                            |
| 6         | Instrument              | Avance                                                     |
| 7         | Author                  |                                                            |
| 8         | Solvent                 | DMSO                                                       |
| 9         | Temperature             | 298.0                                                      |
| 10        | Pulse Sequence          | deptsp135                                                  |
| 11        | Experiment              | DEPT_135                                                   |
| 12        | Probe                   | Z144570_0007 (PA TBI 600S3 H/ C-BB-D-.05 Z)                |
| 13        | Number of Scans         | 10240                                                      |
| 14        | Receiver Gain           | 101.0                                                      |
| 15        | Relaxation Delay        | 2.0000                                                     |
| 16        | Pulse Width             | 20.0000                                                    |
| 17        | Presaturation Frequency |                                                            |
| 18        | Acquisition Time        | 0.9175                                                     |
| 19        | Acquisition Date        | 2022-10-23T11:19:00                                        |
| 20        | Modification Date       | 2022-10-23T11:18:55                                        |
| 21        | Class                   |                                                            |
| 22        | Spectrometer Frequency  | 150.91                                                     |
| 23        | Spectral Width          | 35714.3                                                    |
| 24        | Lowest Frequency        | -2767.9                                                    |
| 25        | Nucleus                 | 13C                                                        |
| 26        | Acquired Size           | 32768                                                      |
| 27        | Spectral Size           | 65536                                                      |

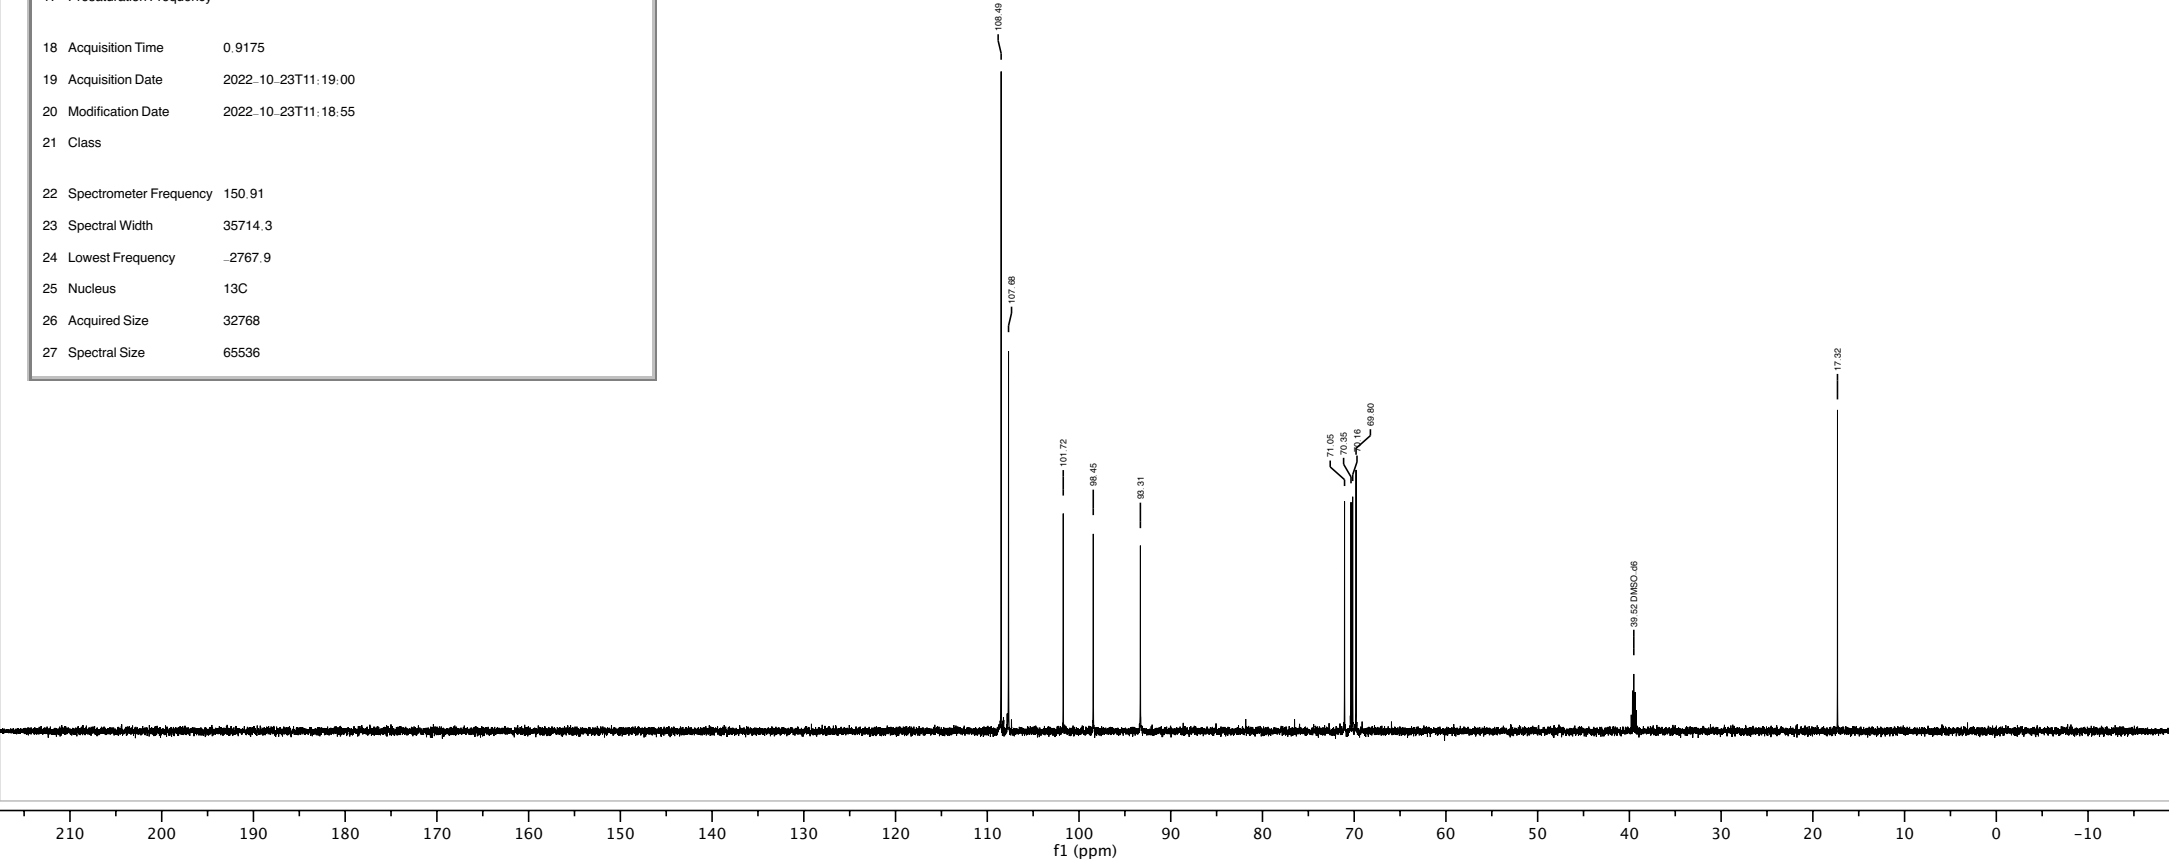

A2.5.ser  
COSY

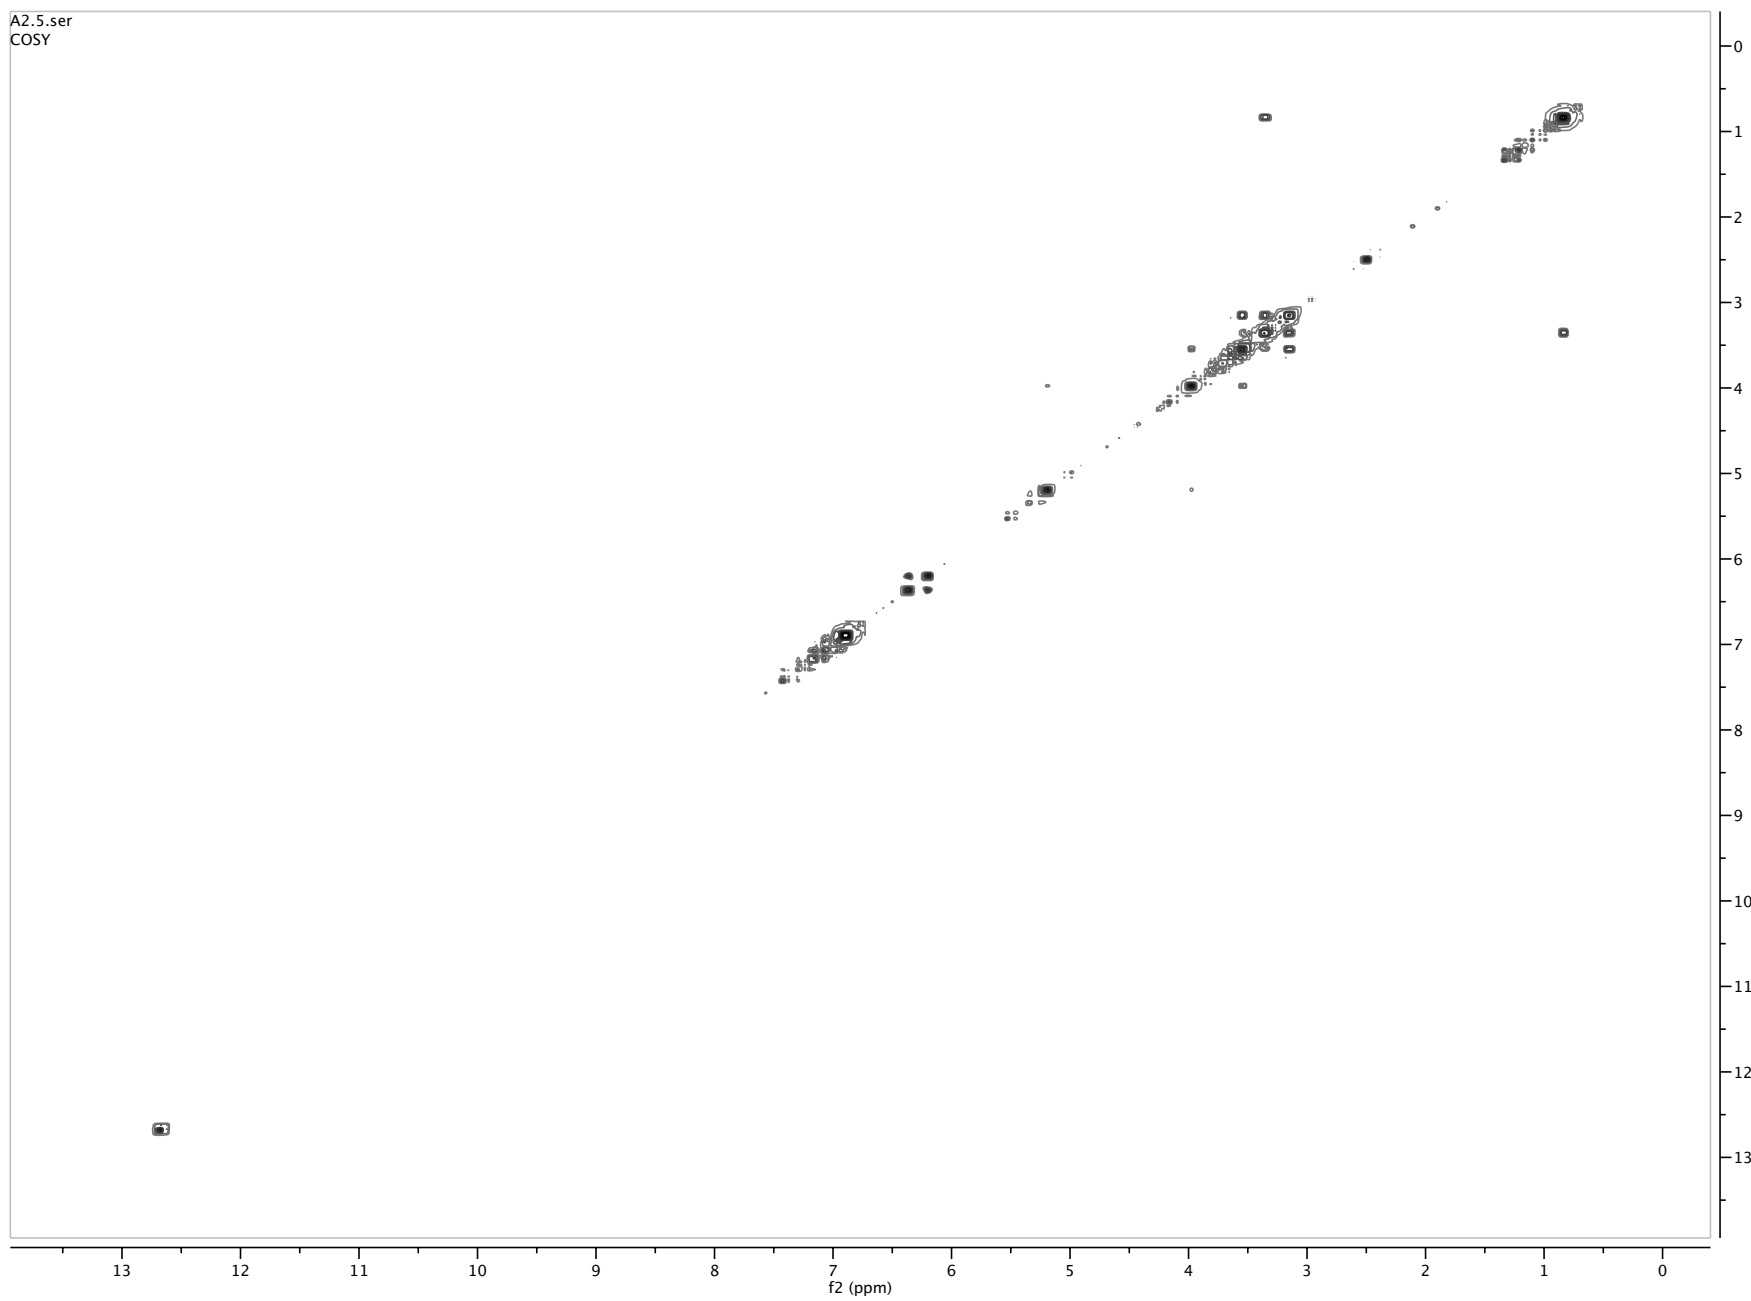

A2.6.ser  
HSQC-EDITED

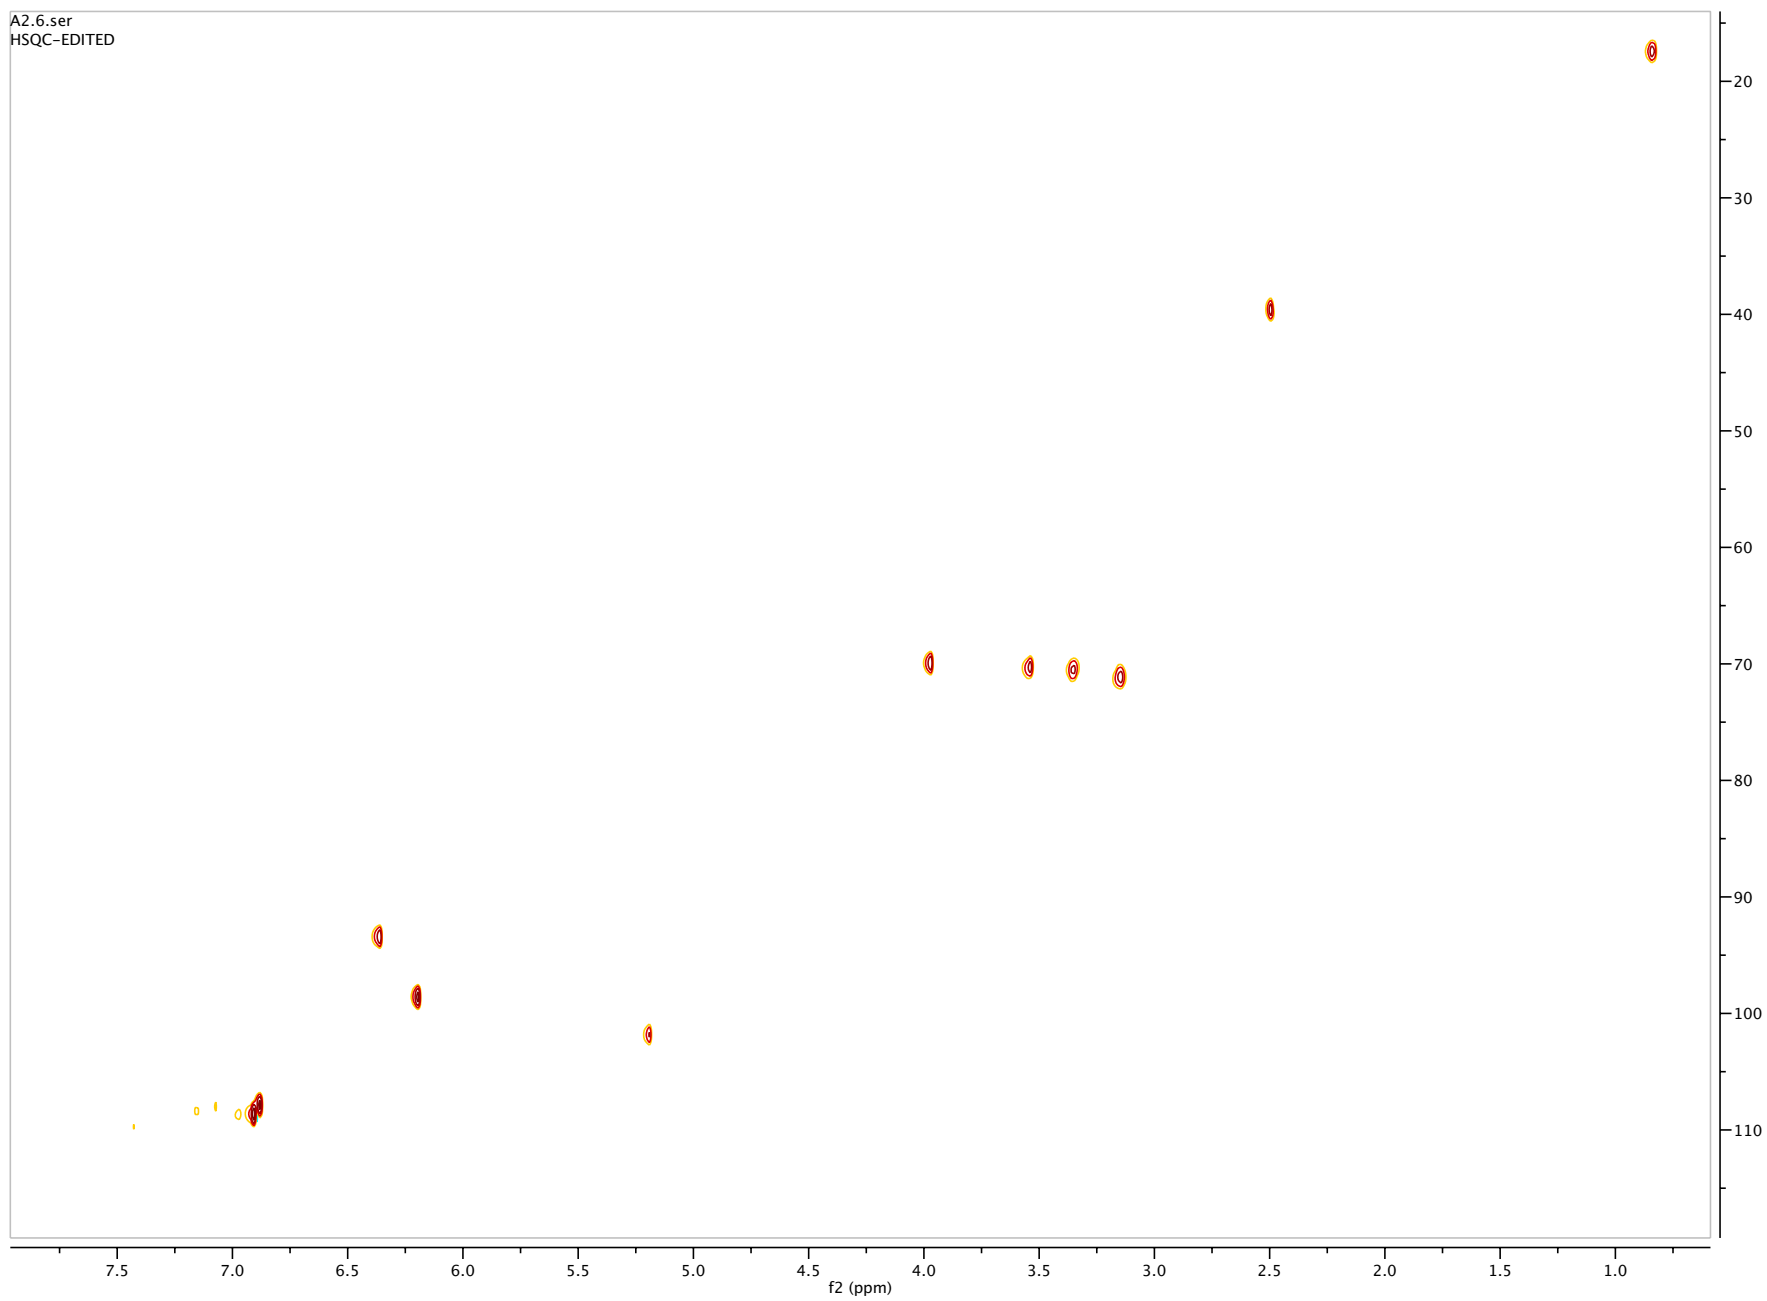

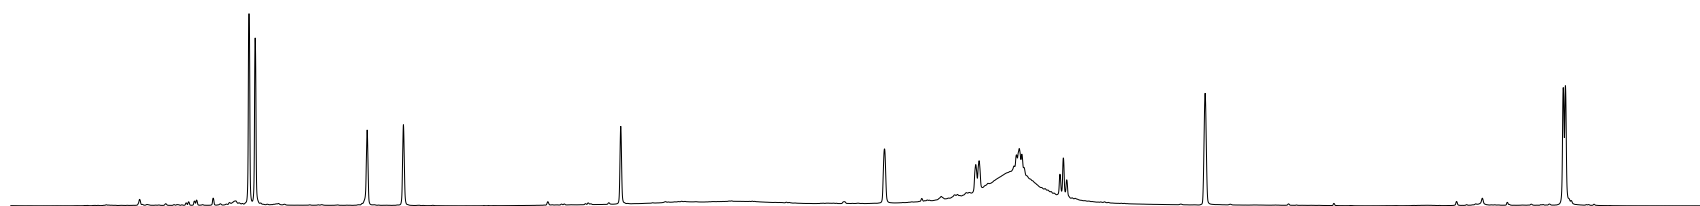

A2.7.ser  
HMBC

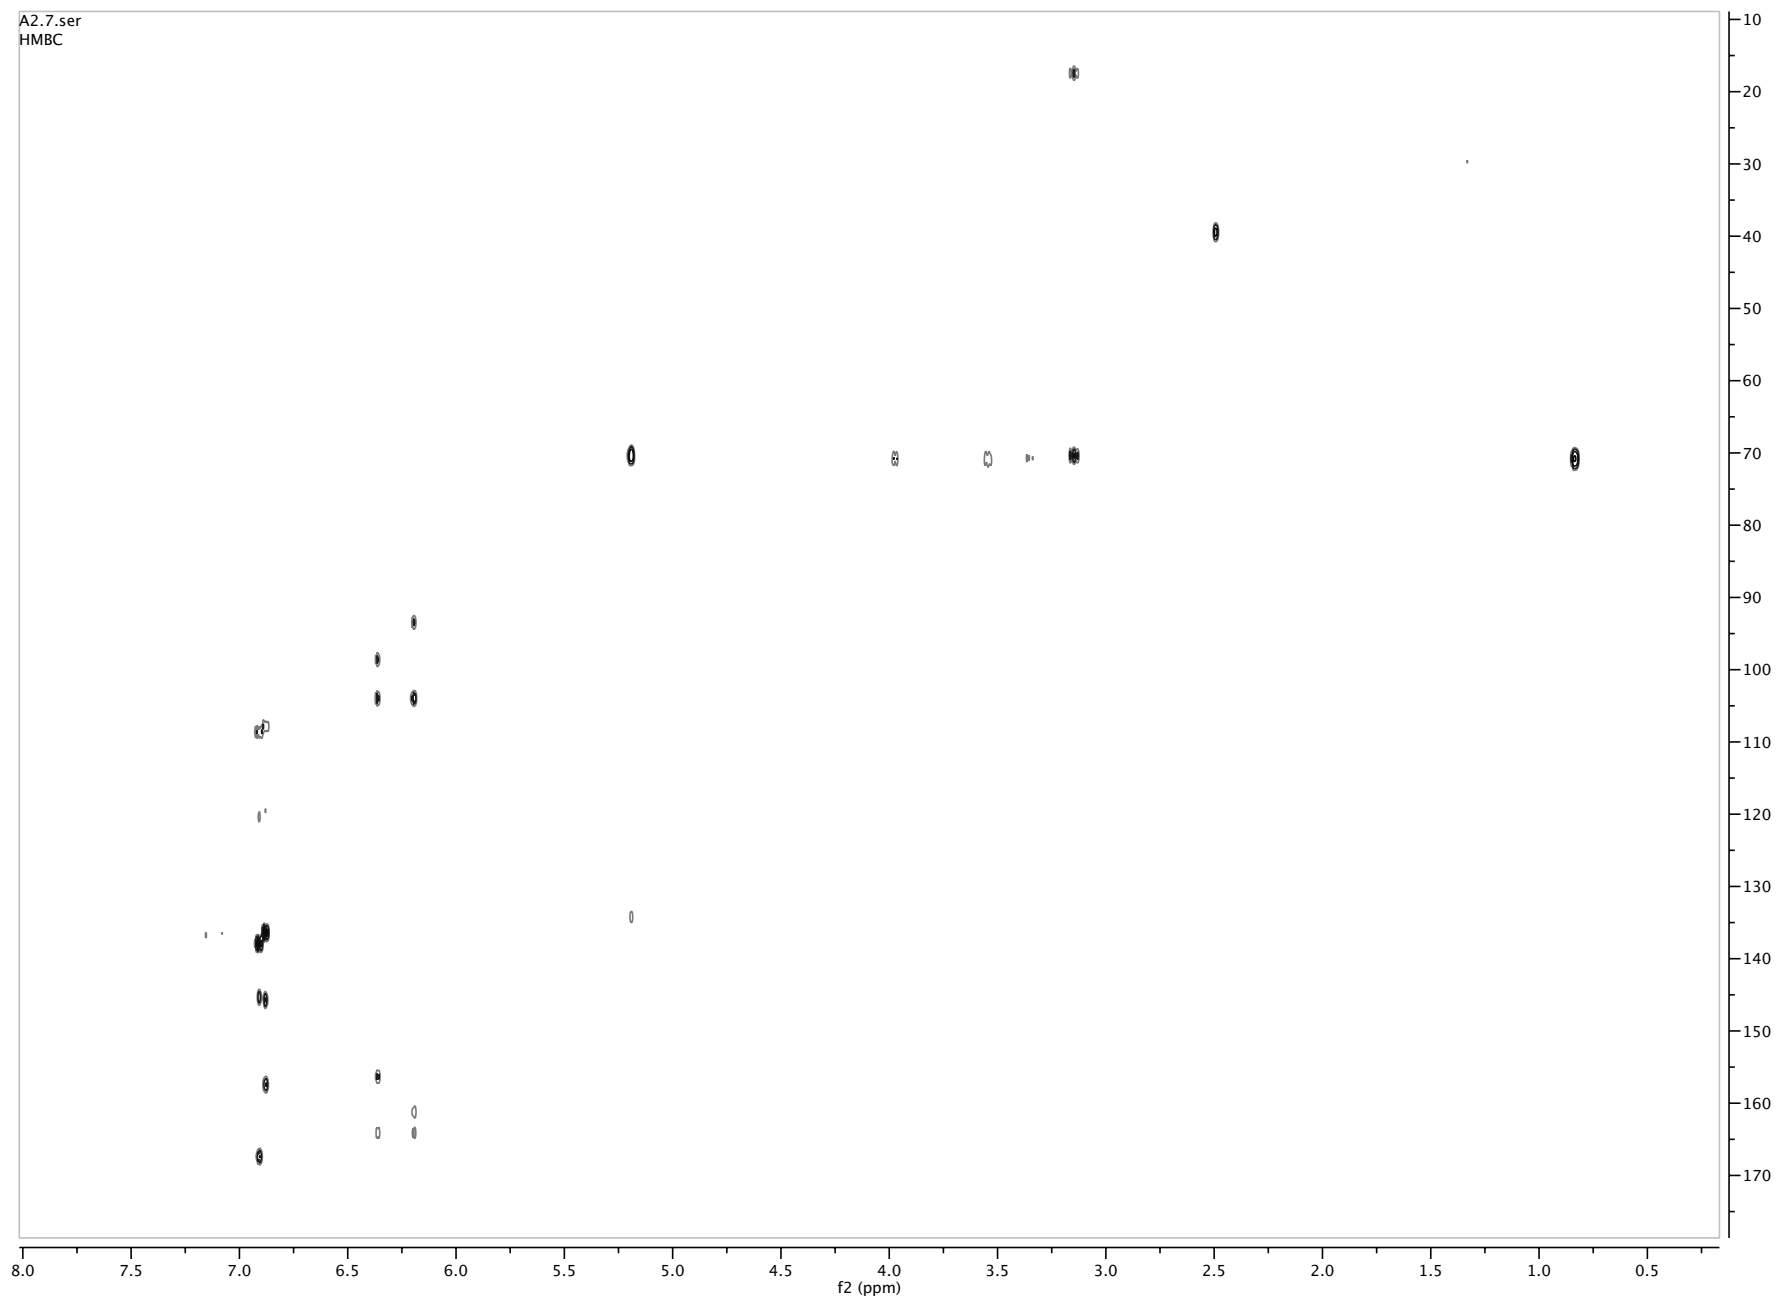

Supplement: s1 [file s1]
