# Supplementary material
Source: MDPI journal article supplement (https://www.mdpi.com/2218-0532/91/3/42)

A3.1.fid  
1D

| Parameter                  | Value                                                    |
|----------------------------|----------------------------------------------------------|
| 1 Title                    | A3.1.fid                                                 |
| 2 Comment                  | PROTON DMSO {D:\nmrdata\2022\ Oktober\ WSU\ Ayo} nmrsu 3 |
| 3 Origin                   | Bruker BioSpin GmbH                                      |
| 4 Owner                    | nmrsu                                                    |
| 5 Site                     |                                                          |
| 6 Instrument               | Avance                                                   |
| 7 Author                   |                                                          |
| 8 Solvent                  | DMSO                                                     |
| 9 Temperature              | 298.0                                                    |
| 10 Pulse Sequence          | zg30                                                     |
| 11 Experiment              | 1D                                                       |
| 12 Probe                   | Z144570_0007 (PA TBI 600S3 H / C-BB-D-.05 Z)             |
| 13 Number of Scans         | 64                                                       |
| 14 Receiver Gain           | 101.0                                                    |
| 15 Relaxation Delay        | 1.0000                                                   |
| 16 Pulse Width             | 10.0000                                                  |
| 17 Presaturation Frequency |                                                          |
| 18 Acquisition Time        | 2.7525                                                   |
| 19 Acquisition Date        | 2022-10-20T07:28:13                                      |
| 20 Modification Date       | 2022-10-20T07:28:09                                      |
| 21 Class                   |                                                          |
| 22 Spectrometer Frequency  | 600.09                                                   |
| 23 Spectral Width          | 11904.8                                                  |
| 24 Lowest Frequency        | -2246.8                                                  |
| 25 Nucleus                 | 1H                                                       |
| 26 Acquired Size           | 32768                                                    |
| 27 Spectral Size           | 131072                                                   |

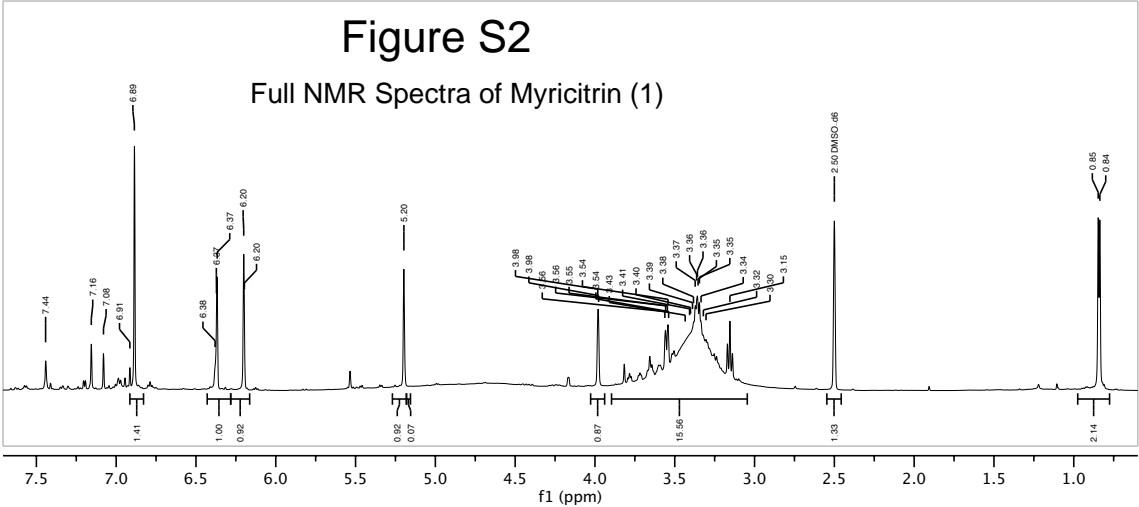

|    | ppm   | Hz     |    | ppm  | Hz     |
|----|-------|--------|----|------|--------|
| 1  | 12.68 | 7611.0 | 29 | 3.45 | 2072.6 |
| 2  | 7.44  | 4466.0 | 30 | 3.45 | 2068.2 |
| 3  | 7.16  | 4294.2 | 31 | 3.43 | 2061.1 |
| 4  | 7.08  | 4248.3 | 32 | 3.41 | 2044.7 |
| 5  | 6.91  | 4149.1 | 33 | 3.40 | 2041.2 |
| 6  | 6.89  | 4132.2 | 34 | 3.39 | 2033.6 |
| 7  | 6.38  | 3828.7 | 35 | 3.38 | 2029.9 |
| 8  | 6.37  | 3823.5 | 36 | 3.37 | 2023.4 |
| 9  | 6.37  | 3821.0 | 37 | 3.36 | 2018.0 |
| 10 | 6.20  | 3721.0 | 38 | 3.36 | 2015.0 |
| 11 | 6.20  | 3718.5 | 39 | 3.35 | 2012.7 |
| 12 | 5.20  | 3118.8 | 40 | 3.35 | 2007.6 |
| 13 | 3.98  | 2389.9 | 41 | 3.34 | 2001.4 |
| 14 | 3.98  | 2386.6 | 42 | 3.32 | 1992.8 |
| 15 | 3.82  | 2290.2 | 43 | 3.30 | 1982.8 |
| 16 | 3.66  | 2194.2 | 44 | 3.29 | 1977.2 |
| 17 | 3.64  | 2186.1 | 45 | 3.28 | 1970.4 |
| 18 | 3.60  | 2161.5 | 46 | 3.28 | 1967.0 |
| 19 | 3.59  | 2154.2 | 47 | 3.26 | 1957.8 |
| 20 | 3.56  | 2137.5 | 48 | 3.25 | 1952.3 |
| 21 | 3.56  | 2134.7 | 49 | 3.24 | 1943.2 |
| 22 | 3.55  | 2128.1 | 50 | 3.23 | 1936.9 |
| 23 | 3.54  | 2125.6 | 51 | 3.21 | 1926.7 |
| 24 | 3.54  | 2123.3 | 52 | 3.17 | 1902.2 |
| 25 | 3.52  | 2110.4 | 53 | 3.15 | 1892.9 |
| 26 | 3.50  | 2103.0 | 54 | 3.14 | 1883.5 |
| 27 | 3.47  | 2083.0 | 55 | 0.85 | 508.1  |
| 28 | 3.46  | 2077.7 | 56 | 0.84 | 502.0  |

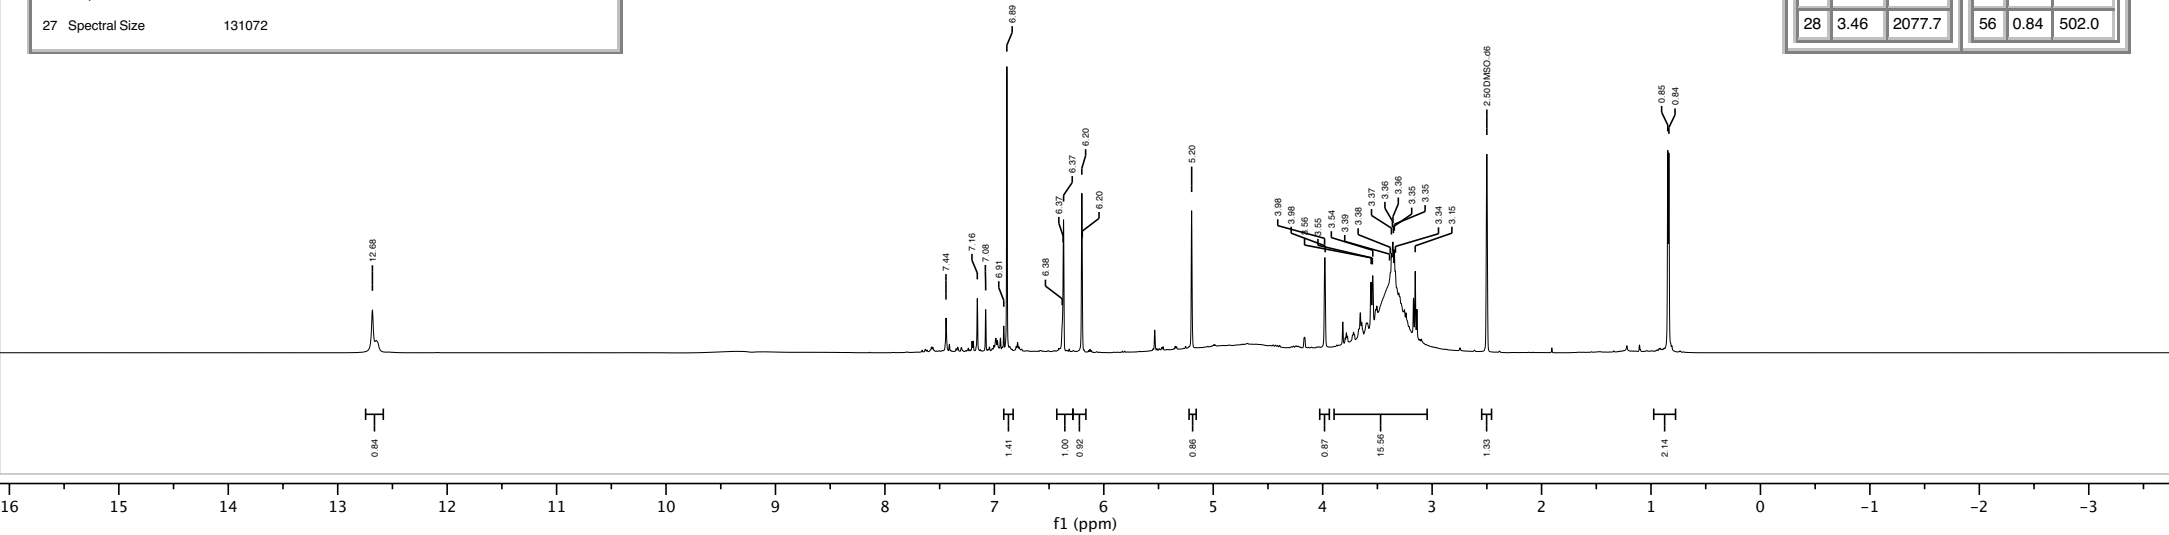

A11.3.fid  
1D

| Parameter |                         | Value                                                 |
|-----------|-------------------------|-------------------------------------------------------|
| 1         | Title                   | A3.3.fid                                              |
| 2         | Comment                 | C13CPD DMSO (D:\nmrdata\2022\Oktober\WSU\Ayo) nmrsu 3 |
| 3         | Origin                  | Bruker BioSpin GmbH                                   |
| 4         | Owner                   | nmrsu                                                 |
| 5         | Site                    |                                                       |
| 6         | Instrument              | Avance                                                |
| 7         | Author                  |                                                       |
| 8         | Solvent                 | DMSO                                                  |
| 9         | Temperature             | 298.0                                                 |
| 10        | Pulse Sequence          | zgpg30                                                |
| 11        | Experiment              | 1D                                                    |
| 12        | Probe                   | Z144570_0007 (PA TBI 600S3 H / C-BB-D-.05 Z)          |
| 13        | Number of Scans         | 1024                                                  |
| 14        | Receiver Gain           | 101.0                                                 |
| 15        | Relaxation Delay        | 2.0000                                                |
| 16        | Pulse Width             | 20.0000                                               |
| 17        | Presaturation Frequency |                                                       |
| 18        | Acquisition Time        | 0.9175                                                |
| 19        | Acquisition Date        | 2022-10-24T16:57:40                                   |
| 20        | Modification Date       | 2022-10-24T16:57:39                                   |
| 21        | Class                   |                                                       |
| 22        | Spectrometer Frequency  | 150.91                                                |
| 23        | Spectral Width          | 35714.3                                               |
| 24        | Lowest Frequency        | -2767.9                                               |
| 25        | Nucleus                 | 13C                                                   |
| 26        | Acquired Size           | 32768                                                 |
| 27        | Spectral Size           | 65536                                                 |

<sup>13</sup>C NMR (151 MHz, DMSO) δ 177.83, 164.21, 161.36, 157.54, 156.45, 145.81, 136.49, 134.32, 119.64, 107.93, 104.08, 101.97, 98.69, 93.55, 71.30, 70.59, 70.42, 70.05, 17.56.

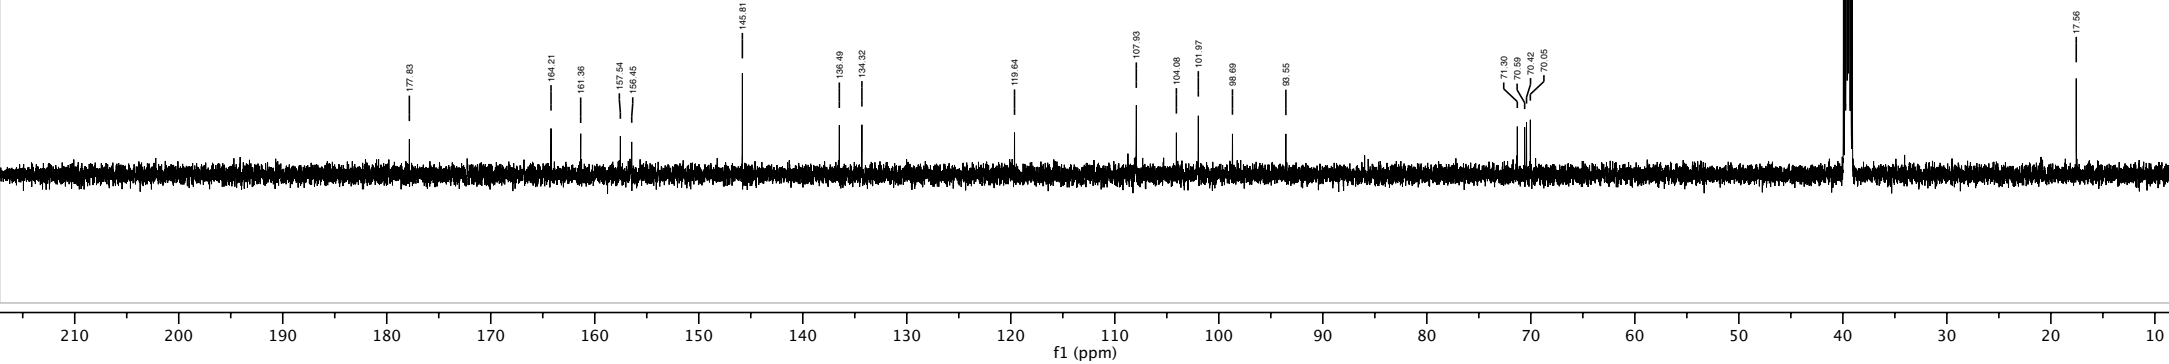

| Parameter |                         | Value                                                      |
|-----------|-------------------------|------------------------------------------------------------|
| 1         | Title                   | A3.4.fid                                                   |
| 2         | Comment                 | C13DEPT135p DMSO {D:\nmrdata\2022\Oktober\WSU\Ayo} nmrsu 3 |
| 3         | Origin                  | Bruker BioSpin GmbH                                        |
| 4         | Owner                   | nmrsu                                                      |
| 5         | Site                    |                                                            |
| 6         | Instrument              | Avance                                                     |
| 7         | Author                  |                                                            |
| 8         | Solvent                 | DMSO                                                       |
| 9         | Temperature             | 298.0                                                      |
| 10        | Pulse Sequence          | depts135                                                   |
| 11        | Experiment              | DEPT-135                                                   |
| 12        | Probe                   | Z144570_0007 (PA TBI 600S3 H / C-BB-D-.05 Z)               |
| 13        | Number of Scans         | 256                                                        |
| 14        | Receiver Gain           | 101.0                                                      |
| 15        | Relaxation Delay        | 2.0000                                                     |
| 16        | Pulse Width             | 20.0000                                                    |
| 17        | Presaturation Frequency |                                                            |
| 18        | Acquisition Time        | 0.9175                                                     |
| 19        | Acquisition Date        | 2022-10-24T17:11:26                                        |
| 20        | Modification Date       | 2022-10-24T17:11:20                                        |
| 21        | Class                   |                                                            |
| 22        | Spectrometer Frequency  | 150.91                                                     |
| 23        | Spectral Width          | 35714.3                                                    |
| 24        | Lowest Frequency        | -2767.9                                                    |
| 25        | Nucleus                 | 13C                                                        |
| 26        | Acquired Size           | 32768                                                      |
| 27        | Spectral Size           | 65536                                                      |

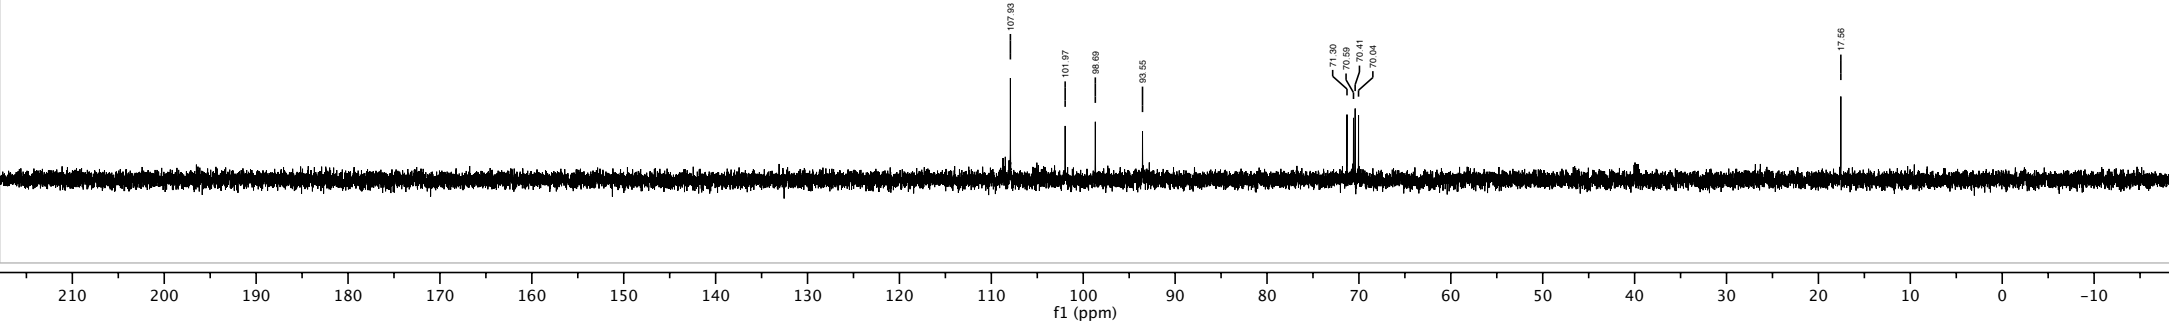

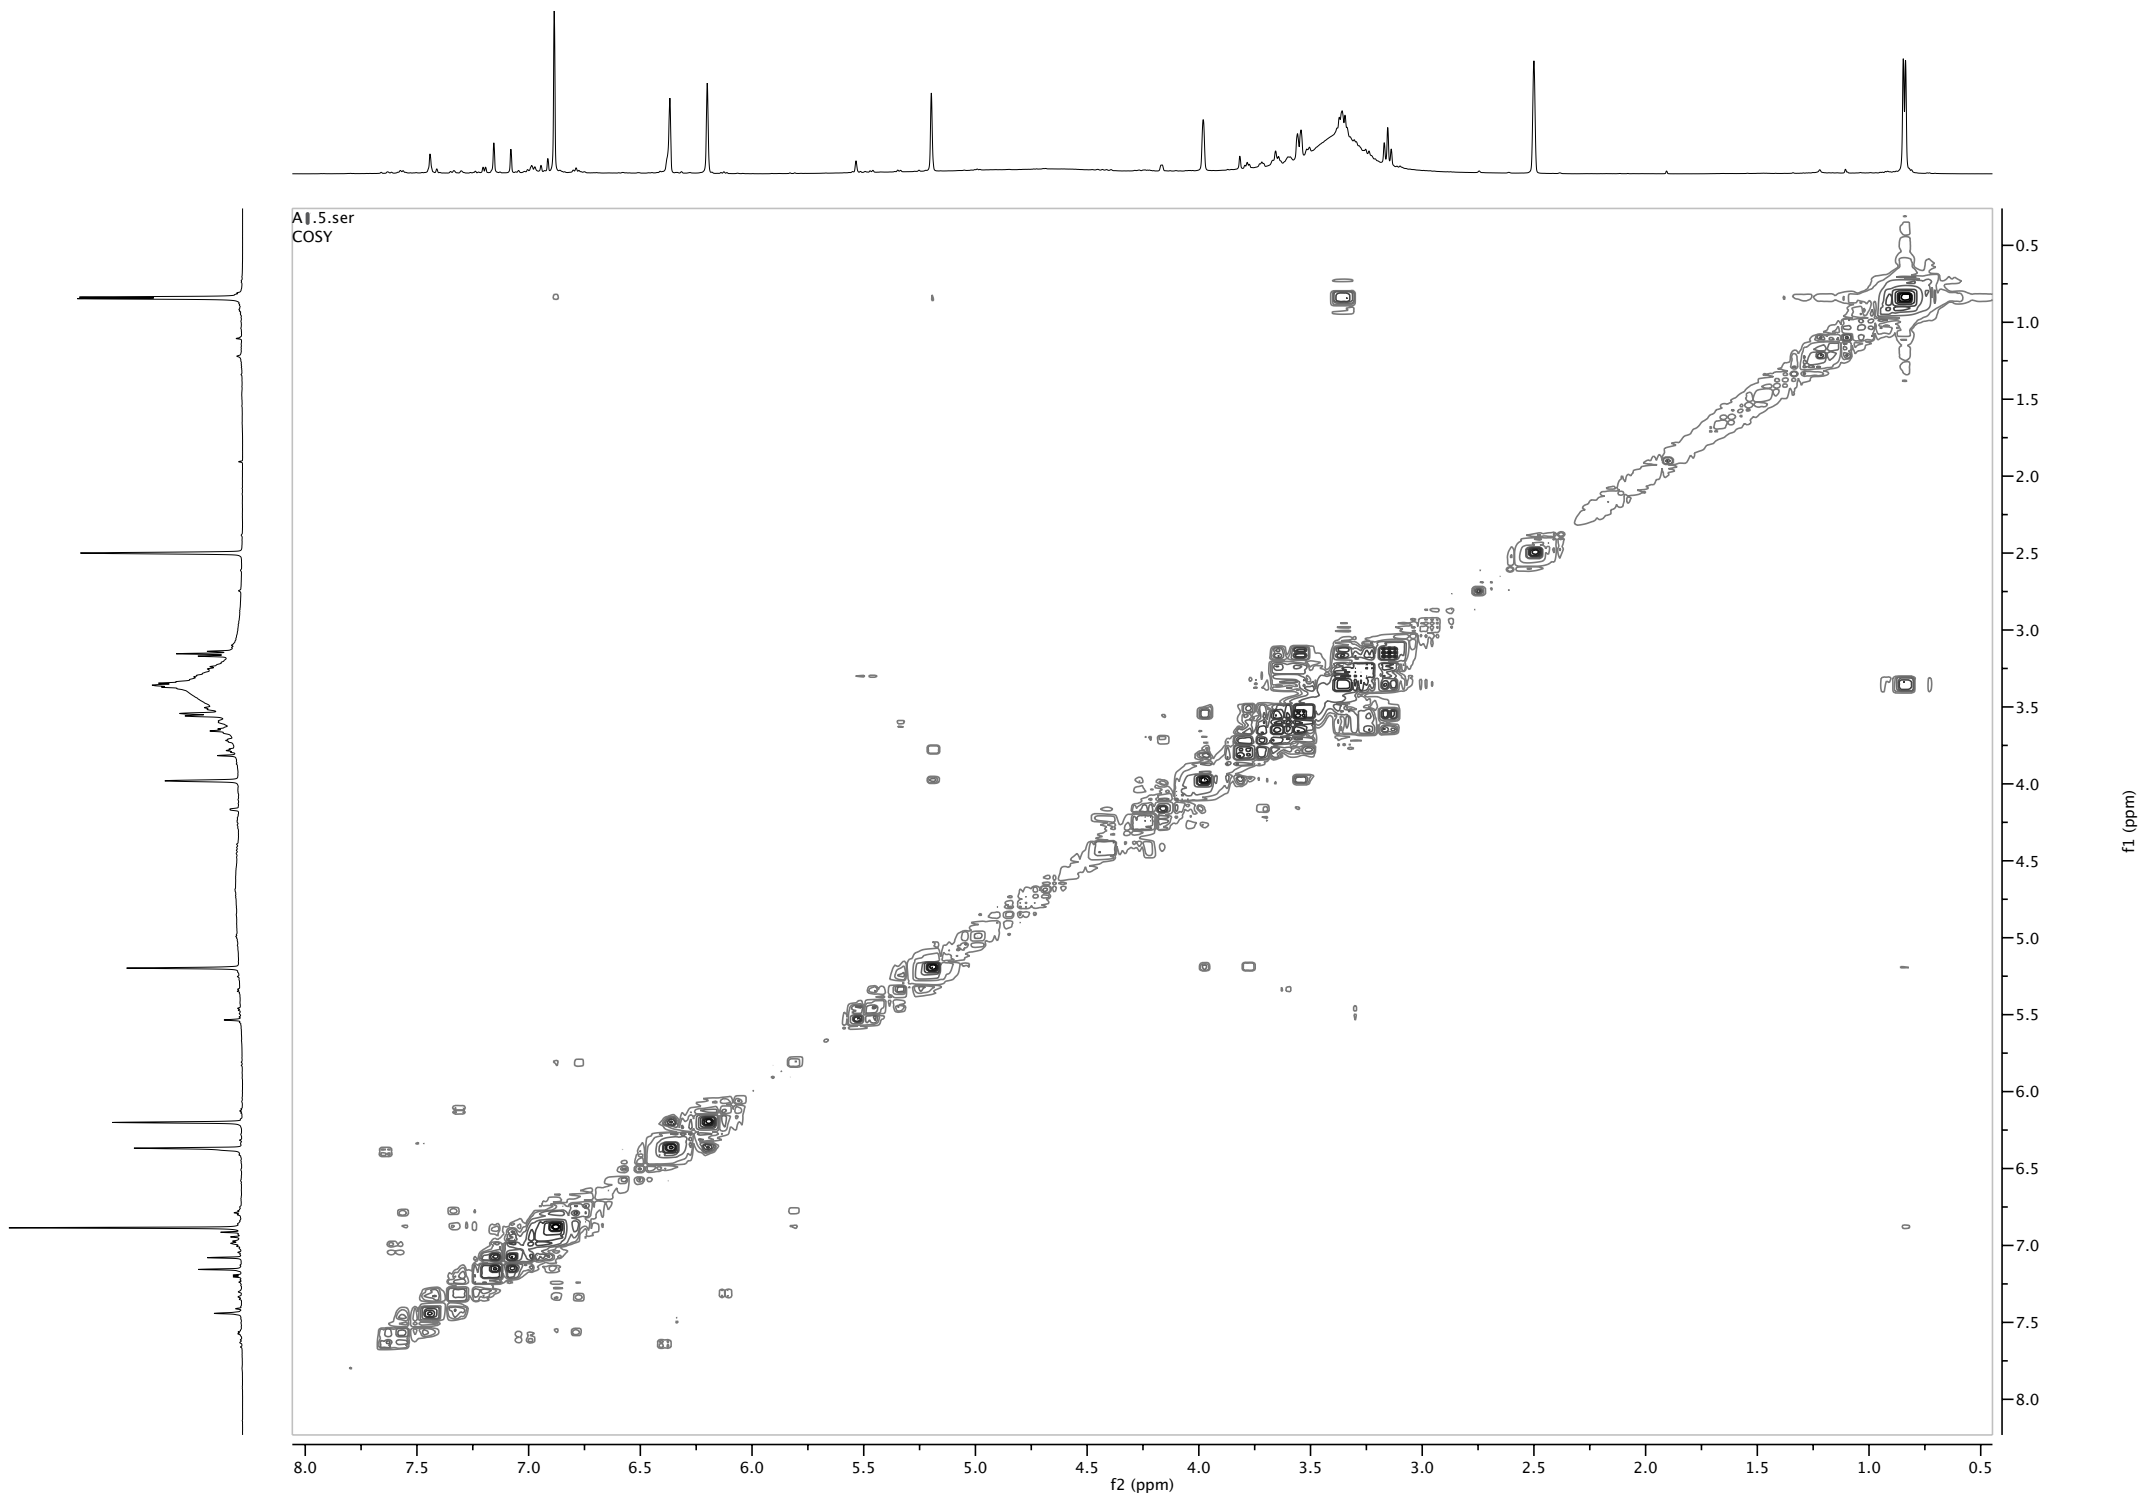

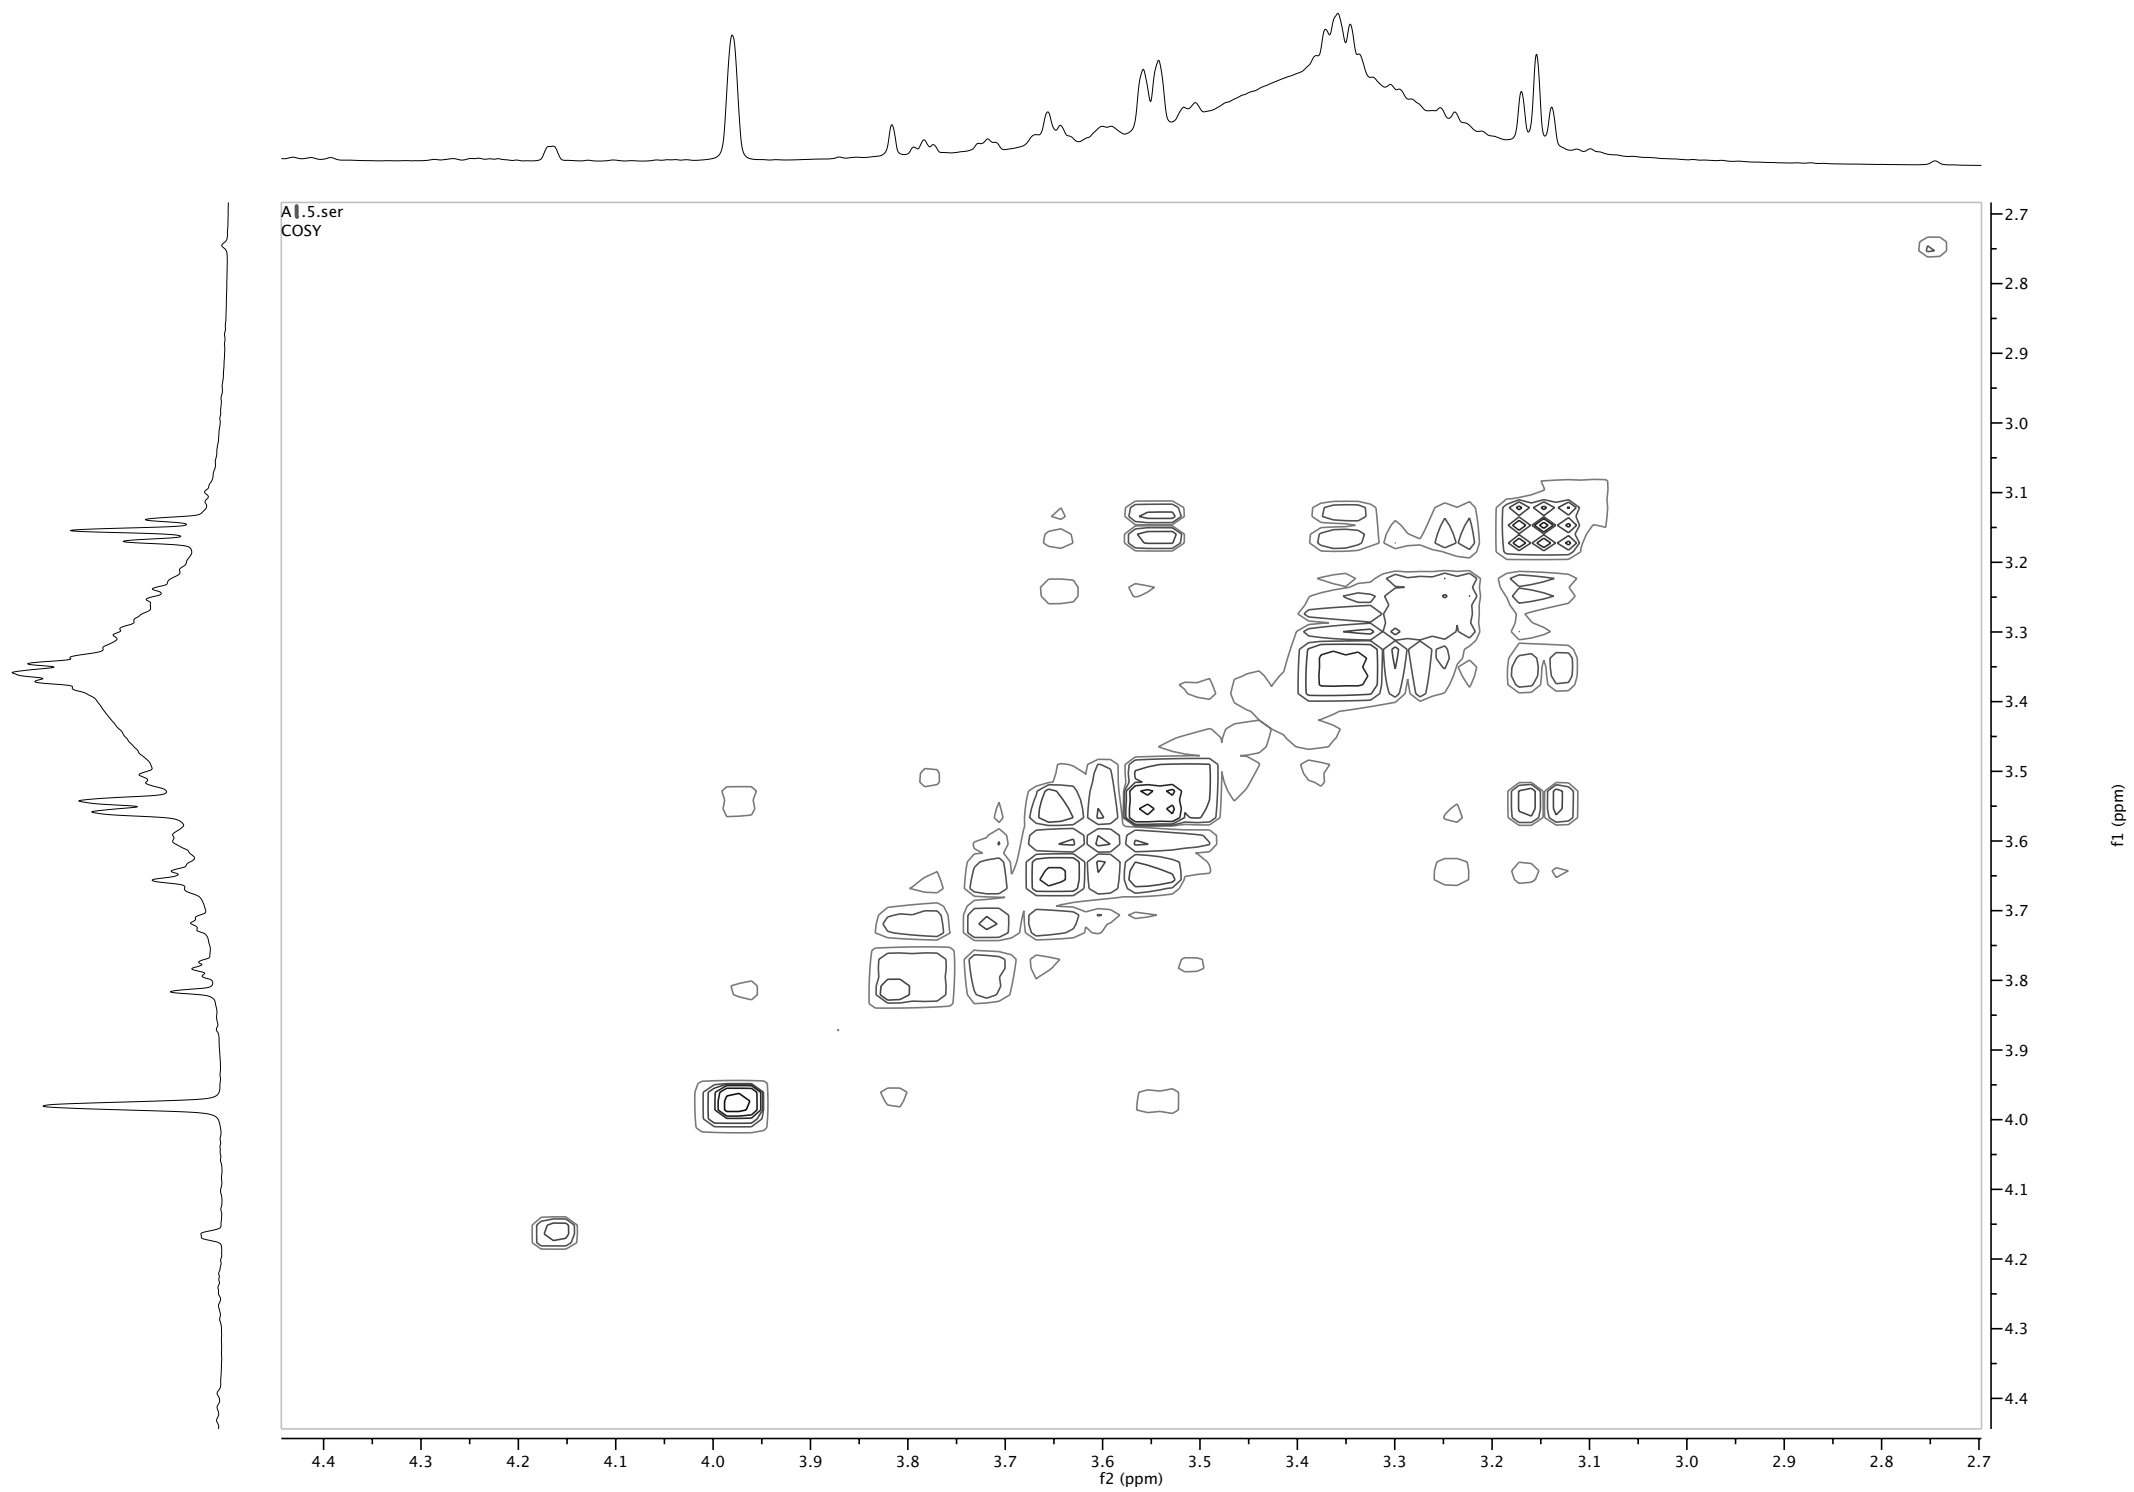

A1.6.ser  
HSQC-EDITED

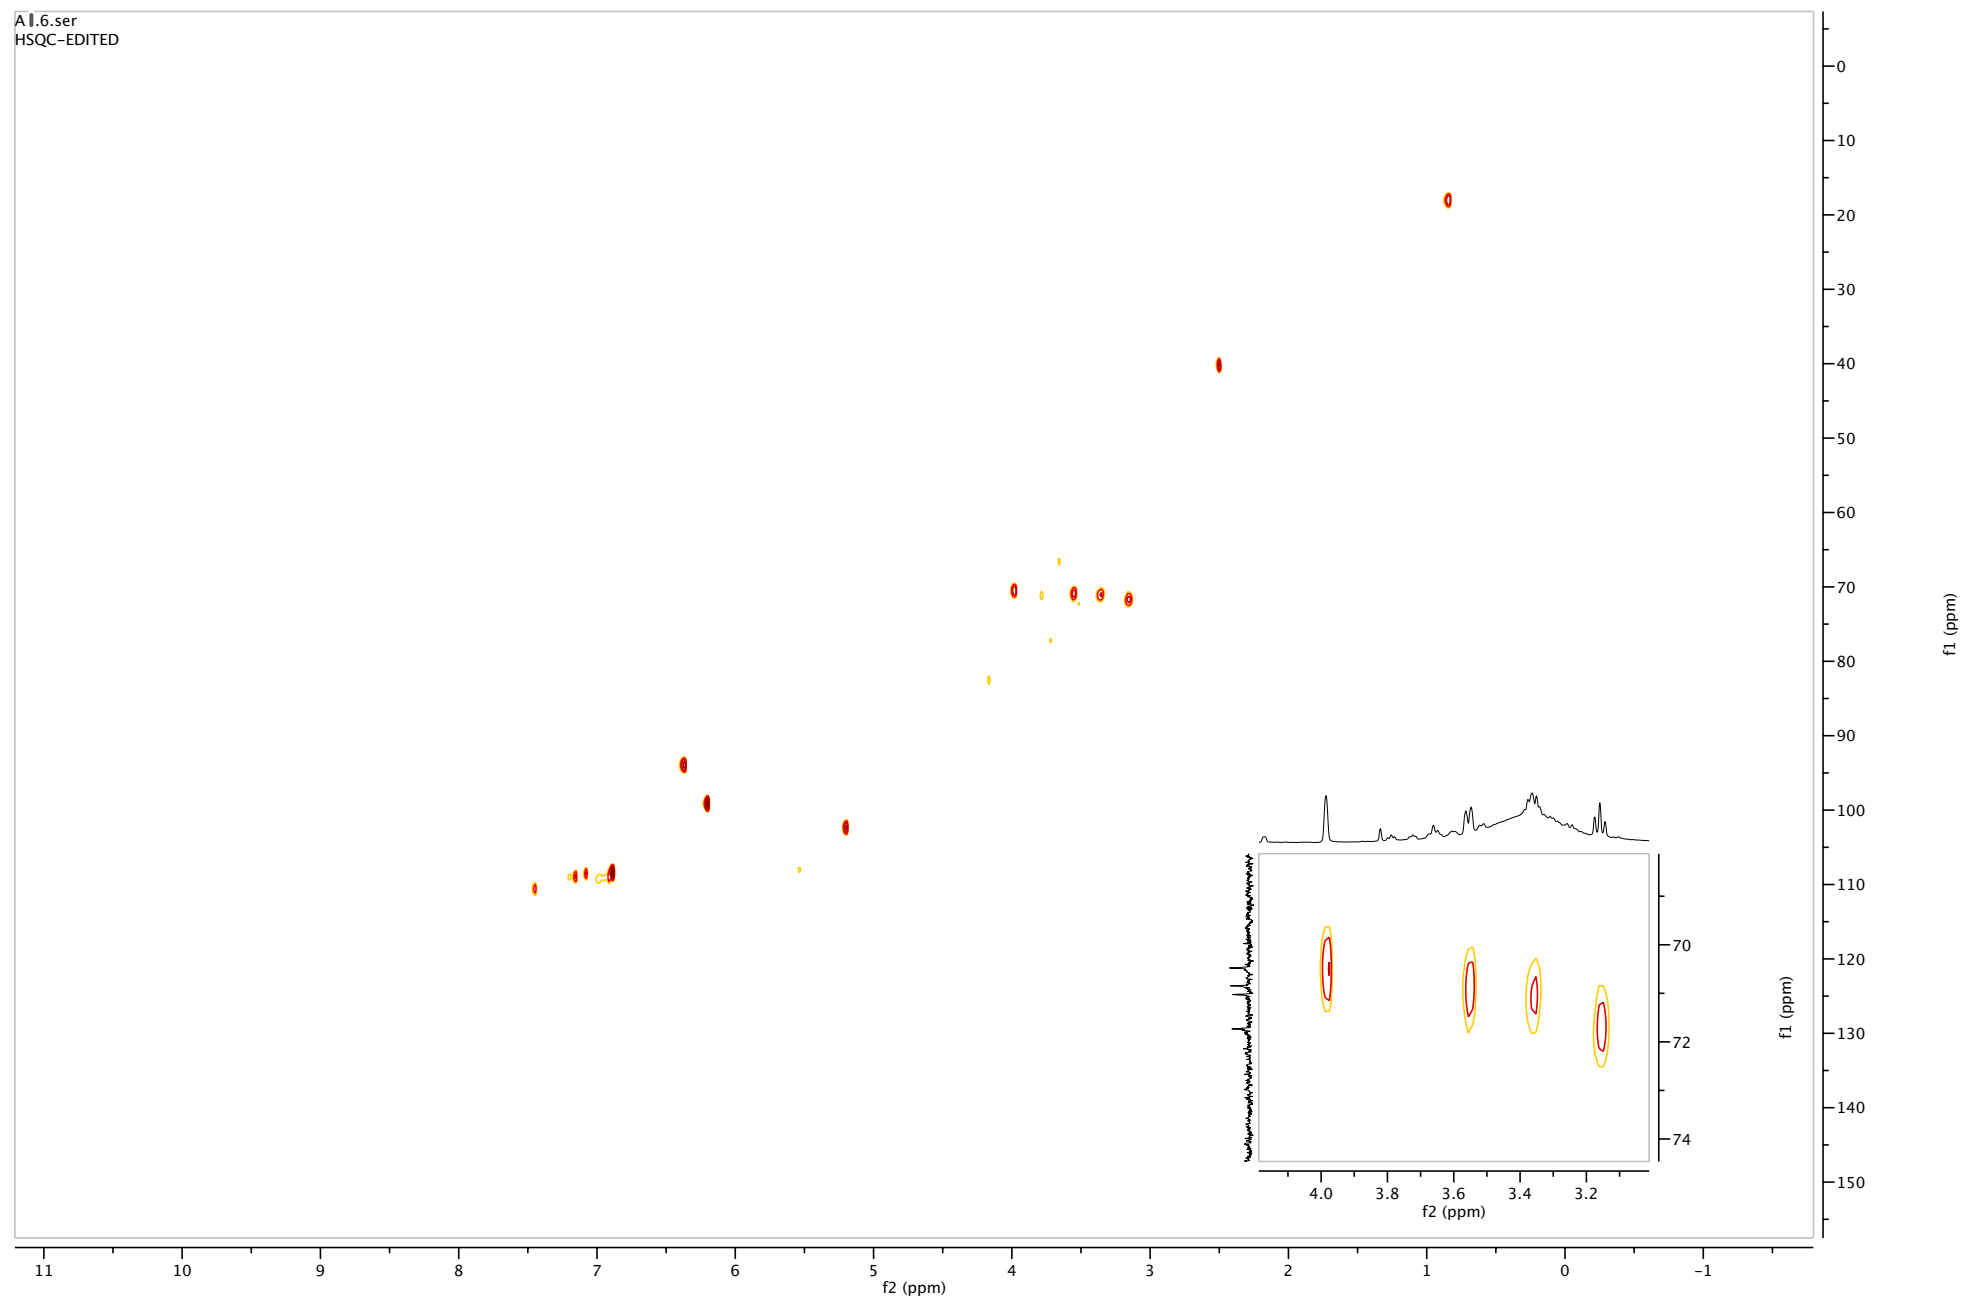

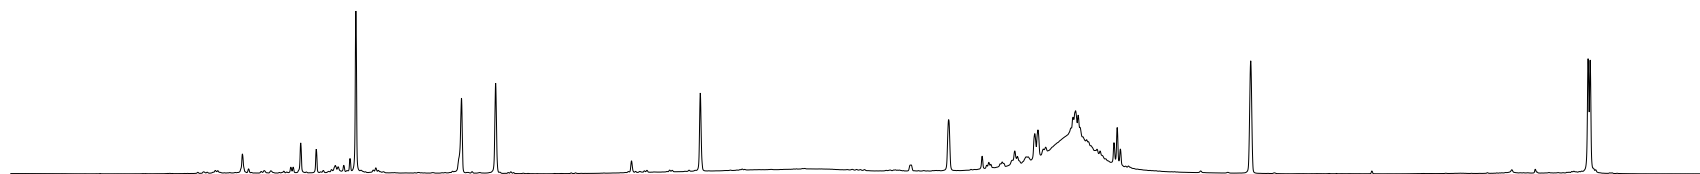

All.7.ser  
HMBC

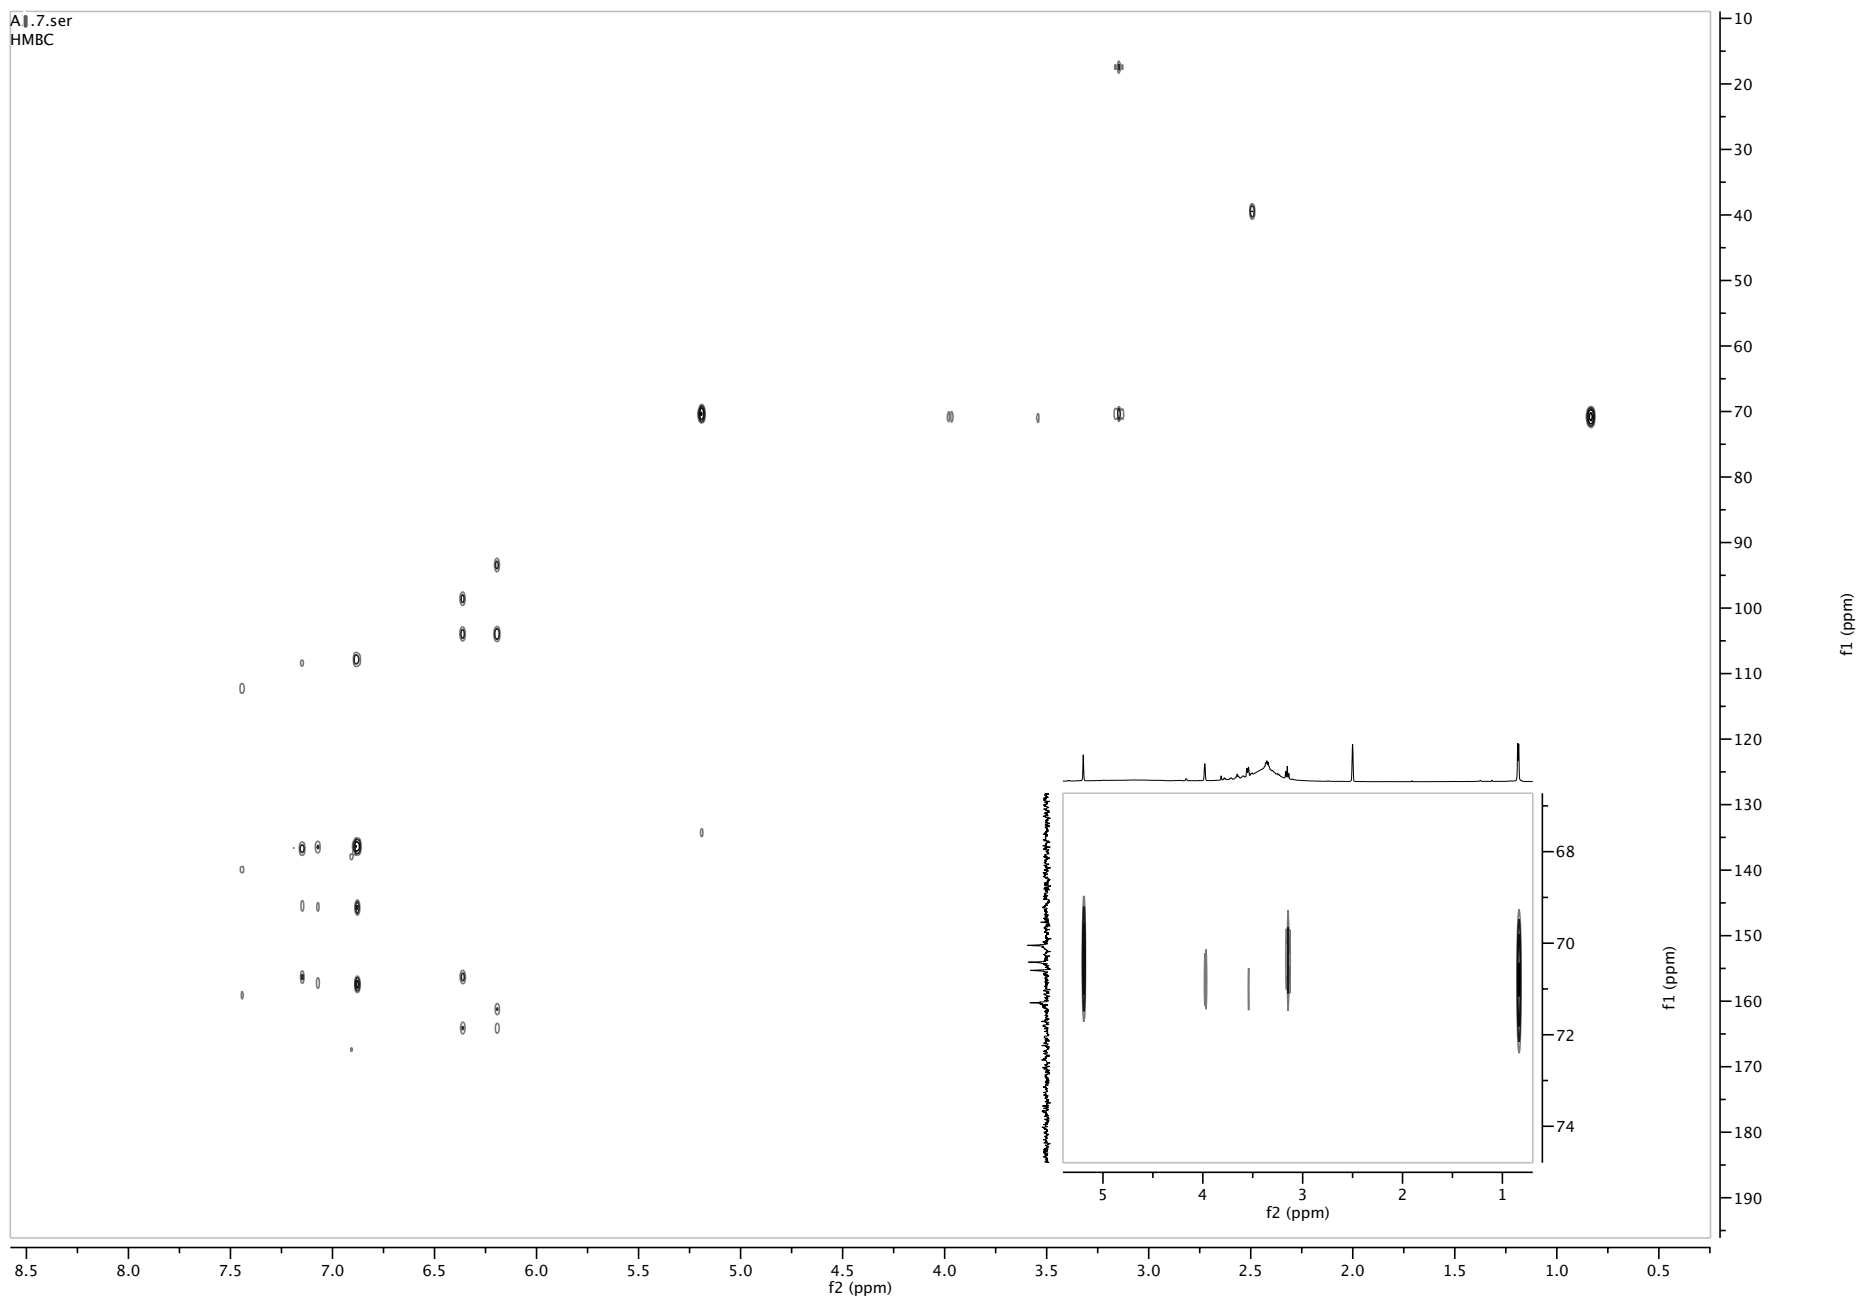

Supplement: s1 [file s1]
