# Supplementary material
Source: MDPI journal article supplement (https://www.mdpi.com/2218-0532/91/3/42)

# HRESI-MS of Myricitrin (1)

A1

MS\_Direct\_221107\_15 496 (3.876)

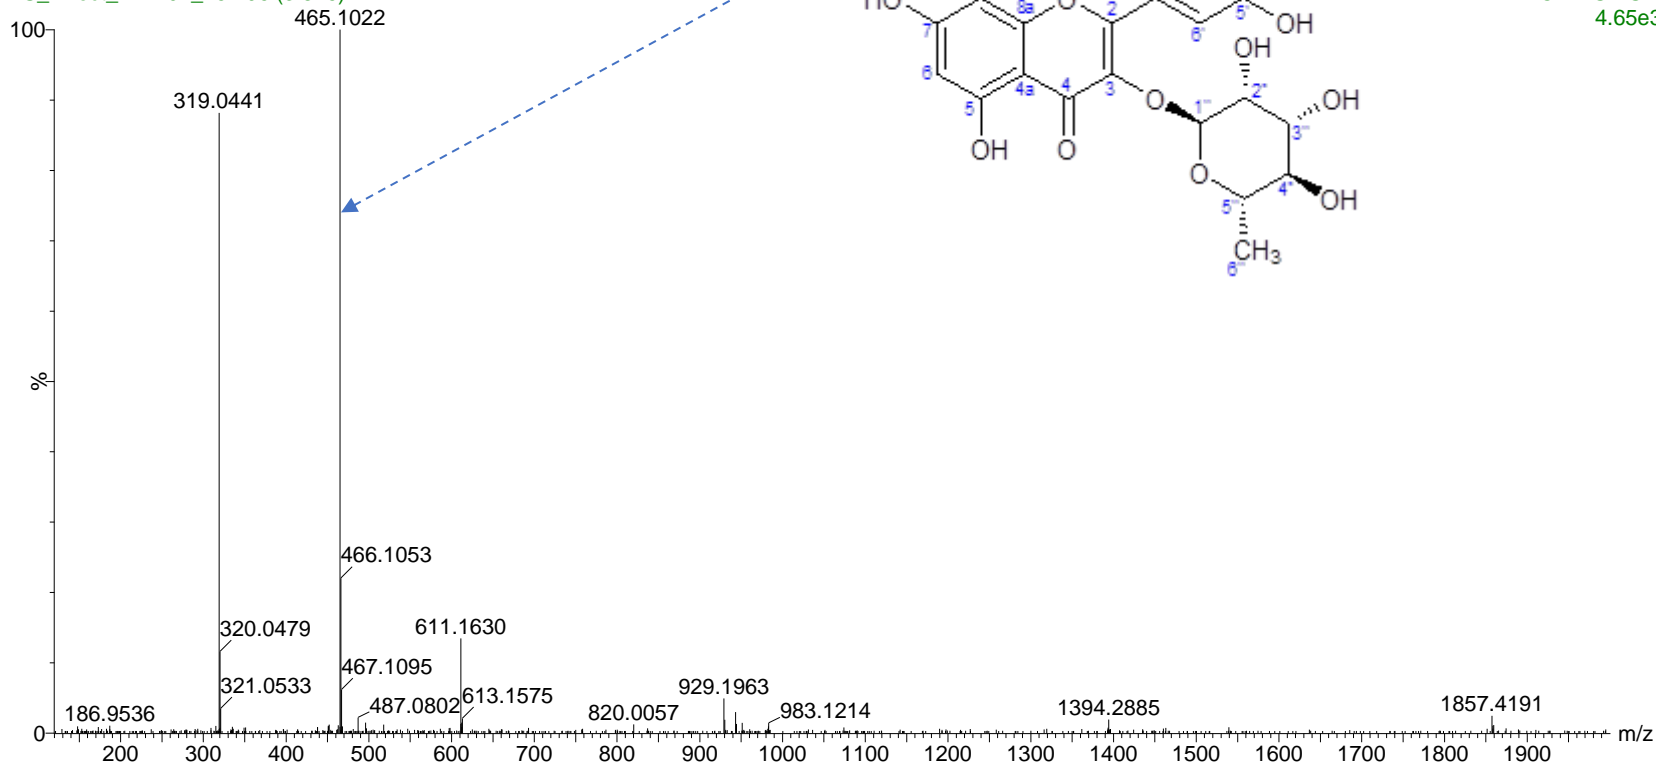

Supplement: s1 [file s1]

## HRESI-MS of Unifloratrin (2)

A2

MS\_Direct\_221107\_16 496 (3.876)

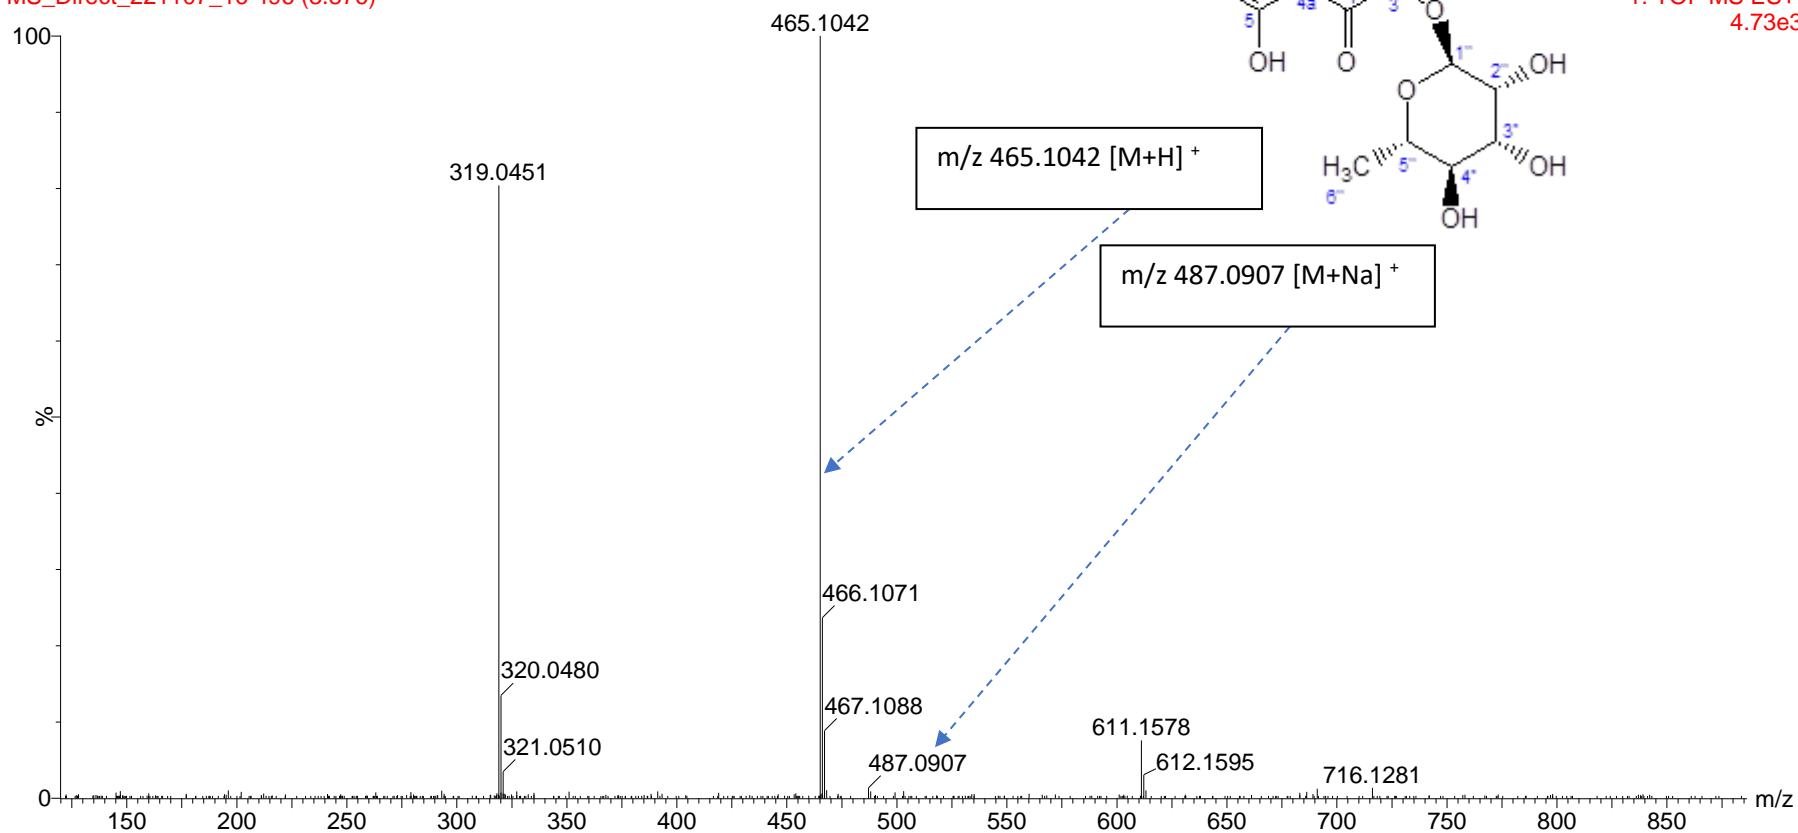

Supplement: s1 [file s1]
